1 **Title (50-word maximum):** Repeated administration of 2-hydroxypropyl- $\beta$ -cyclodextrin  
2 (HP $\beta$ CD) attenuates the chronic inflammatory response to experimental stroke

3

4 **Abbreviated Title (50-character maximum):** HP $\beta$ CD attenuates chronic inflammation  
5 after stroke

6

7 Danielle A. Bechtel<sup>1</sup>, Jacob C. Zbesko<sup>1</sup>, Jennifer B. Frye<sup>1</sup>, Amanda G. Chung<sup>1</sup>, Megan

8 Hayes<sup>1</sup>, Kylie Calderon<sup>1</sup>, Jeffrey W. Grover<sup>2</sup>, Anna Li<sup>1,3</sup>, Frankie G. Garcia<sup>1</sup>, Marco A.

9 Tavera-Garcia<sup>1</sup>, Rick G. Schnellmann<sup>4</sup>, Hsin-Jung Joyce Wu<sup>1,3</sup>, Thuy-Vi V. Nguyen<sup>1,5</sup>,

10 Kristian P. Doyle<sup>\*1,5,6,7,8,9</sup>

11

12 <sup>1</sup>Department of Immunobiology, University of Arizona, Tucson, Arizona, 85719, USA

13 <sup>2</sup>Department of Molecular and Cellular Biology, University of Arizona, Tucson, Arizona,  
14 85719, USA

15 <sup>3</sup>Arizona Arthritis Center, University of Arizona, Tucson, Arizona, 85719

16 <sup>4</sup>Department of Pharmacology and Toxicology, University of Arizona, Tucson, Arizona,  
17 85719, USA

18 <sup>5</sup>Department of Neurology, University of Arizona, Tucson, Arizona, 85719, USA

19 <sup>6</sup>BIO5 Institute, University of Arizona, Tucson, Arizona, 85719, USA

20 <sup>7</sup>Arizona Center on Aging, University of Arizona, Tucson, Arizona, 85719, USA

21 <sup>8</sup>Department of Psychology, University of Arizona, Tucson, Arizona, 85719, USA

22 <sup>9</sup>Department of Neurosurgery, University of Arizona, Tucson, Arizona, 85719, USA

23

24 \*To whom correspondence should be addressed

25

26 Address for Correspondence:

27 Kristian P. Doyle, Ph.D.

28 Department of Immunobiology

29 University of Arizona

30 1656 E. Mabel Street, P.O. Box 245221

31 Tucson, Arizona, 85719

32 Tel: (1) 520-626-7013

33 Email: [doylekr@arizona.edu](mailto:doylekr@arizona.edu)

34

35 **# of Figures:** 14

36 **# of Tables:** 1 (No multimedia or 3D models in this manuscript)

37 **# of Words in Abstract:** 244

38 **# of Words in Introduction:** 586

39 **# of Words in Discussion:** 1296

40

41 **Conflict of Interest Statement:** The authors declare no competing financial interests.

42

43 **Acknowledgments:** This work was funded by NINDS R01NS096091 (KPD), NIA

44 R01AG063808 (TVN), NIA R21AG062781 (TVN), United States Department of

45 Veterans Affairs I01RX003224 (RGS), NIA T32AG058503-01A1 (DAB), NINDS

46 F31NS105455 (JCZ), and the Fondation Leducq Transatlantic Network of Excellence

47 Stroke-IMPACT (KPD). We thank Dr. Oswald Quehenberger (UCSD Lipidomics Core),  
48 Branden Lau, and Jonathan Galina-Mehlman (University of Arizona Genetics Core) for  
49 their technical assistance with lipidomics and transcriptomics analyses. We also thank  
50 Dr. Julia Slone-Murphy (NeuroEdit Ltd) for editing a draft of this manuscript.

51

52 **Abstract (250 words maximum, including citations)**

53

54 Globally, more than 67 million people are living with the effects of ischemic stroke.  
55 Importantly, many stroke survivors develop a chronic inflammatory response that  
56 contributes to cognitive impairment, a common and debilitating sequela of stroke that is  
57 insufficiently studied and currently untreatable. 2-hydroxypropyl- $\beta$ -cyclodextrin (HP $\beta$ CD)  
58 is an FDA-approved cyclic oligosaccharide developed to solubilize and entrap lipophilic  
59 substances. The goal of the present study was to determine whether the repeated  
60 administration of HP $\beta$ CD curtails the chronic inflammatory response to stroke by  
61 reducing lipid accumulation within stroke infarcts in a distal middle cerebral artery  
62 occlusion + hypoxia (DH) mouse model of stroke. We subcutaneously injected young  
63 adult and aged mice with vehicle or HP $\beta$ CD three times per week for up to 7 weeks  
64 following stroke and evaluated them using immunostaining, RNA sequencing,  
65 lipidomics, and behavioral analyses. Chronic stroke infarct and peri-infarct regions of  
66 HP $\beta$ CD-treated mice were characterized by an upregulation of genes involved in lipid  
67 metabolism and a downregulation of genes involved in innate and adaptive immunity,  
68 reactive astrogliosis, and chemotaxis. Correspondingly, HP $\beta$ CD reduced the  
69 accumulation of lipid droplets, T lymphocytes, B lymphocytes, and plasma cells in

70 stroke infarcts. Repeated administration of HP $\beta$ CD also improved recovery through the  
71 preservation of neurons in the striatum and thalamus, induction of c-Fos in hippocampal  
72 regions, protection of hippocampal-dependent spatial working memory, and reduction in  
73 impulsivity at 7 weeks after stroke. These results indicate that systemic HP $\beta$ CD  
74 treatment following stroke attenuates chronic inflammation and secondary  
75 neurodegeneration and prevents post-stroke cognitive decline.

76

### 77 **Significance Statement (120 words maximum)**

78

79 Dementia is a common and debilitating sequela of stroke. Currently, there are no  
80 available treatments for post-stroke dementia. Our study shows that lipid metabolism is  
81 disrupted in chronic stroke infarcts, which causes an accumulation of uncleared lipid  
82 debris and correlates with a chronic inflammatory response. To our knowledge, these  
83 substantial changes in lipid homeostasis have not been previously recognized or  
84 investigated in the context of ischemic stroke. We also provide a proof of principle that  
85 solubilizing and entrapping lipophilic substances using HP $\beta$ CD could be an effective  
86 strategy for treating chronic inflammation after stroke and other CNS injuries. We  
87 propose that using HP $\beta$ CD for the prevention of post-stroke dementia could improve  
88 recovery and increase long-term quality of life in stroke sufferers.

89

### 90 **Introduction (650 words maximum, including citations)**

91

92 Ischemic stroke is a leading cause of death and disability worldwide (Virani et al., 2020).  
93 Of stroke survivors, approximately one-third develop a delayed and progressive form of  
94 cognitive decline (Black, 2011); however, there are currently no targeted  
95 pharmacological interventions to prevent chronic neurodegeneration after stroke. With  
96 an aging global population, there is an increasing need for novel and effective  
97 treatments intended to resolve the chronic inflammatory response and promote  
98 functional recovery after stroke.

99  
100 We previously reported, in a mouse model of post-stroke dementia, that delayed  
101 cognitive impairment is caused by a chronic inflammatory response to stroke that is  
102 mediated in part by B lymphocytes (Doyle et al., 2015; Doyle, Fathali, Siddiqui, &  
103 Buckwalter, 2012). In addition to the progressive infiltration of B lymphocytes, T  
104 lymphocytes, and IgA+ plasma cells into the infarct in the weeks following stroke, the  
105 chronic inflammatory response is also characterized by the production of neurotoxic  
106 molecules such as antibodies, cytokines, and degradative enzymes (Zbesko et al.,  
107 2020; Zbesko et al., 2018). These neurotoxic molecules permeate the glial scar and  
108 promote chronic inflammation and secondary neurodegeneration in the surrounding  
109 parenchyma (Zbesko et al., 2018). Notably, the chronic inflammatory response to stroke  
110 has a similar cellular and molecular profile to atherosclerosis. Chronic stroke infarcts  
111 contain foamy macrophages, lipid droplets, and intracellular and extracellular  
112 cholesterol crystals (Chung et al., 2018). These distinguishing characteristics are  
113 caused by overwhelmed lipid processing systems within macrophages, resulting in the

114 recruitment of adaptive immune cells and the production of pro-inflammatory cytokines  
115 and degradative enzymes.

116

117 Lipids are principal structural components of the myelin sheath and are major  
118 constituents of the human brain (Vance, 2012). Therefore, it is likely that foamy  
119 macrophages and cholesterol crystals form in infarcts following ischemic stroke  
120 because lipid debris derived from the breakdown of myelin and other cell membranes  
121 overwhelms the processing capacity of infiltrating macrophages and resident microglia  
122 (Cantuti-Castelvetri et al., 2018). 2-hydroxypropyl- $\beta$ -cyclodextrin (HP $\beta$ CD) is a U.S.  
123 Food and Drug Administration-approved compound that entraps lipids and promotes  
124 liver X receptor-mediated transcriptional reprogramming in macrophages to improve  
125 cholesterol efflux and incite anti-inflammatory mechanisms (Zimmer et al., 2016).  
126 Importantly, HP $\beta$ CD reduces lipid levels in the lesion following spinal cord injury (Mar et  
127 al., 2016) and prevents lipid overload within phagocytic cells in atherosclerosis and  
128 Niemann–Pick disease type C (Taylor et al., 2012; Matsuo et al., 2013; Zimmer et al.,  
129 2016). Thus, administration of HP $\beta$ CD represents a multi-pronged approach to  
130 mitigating lipid accumulation in phagocytic cells following ischemic stroke.

131

132 The overarching goal of this study was to investigate the efficacy of HP $\beta$ CD as a  
133 potential treatment for chronic inflammation and delayed cognitive impairment following  
134 ischemic stroke. The aims of the current study were 2-fold: (1) to characterize the  
135 lipidome of chronic stroke infarcts and (2) to determine whether lipid complexation and  
136 macrophage reprogramming within infarcts, via the repeated systemic administration of

137 HP $\beta$ CD, attenuates chronic inflammation and secondary neurodegeneration following  
138 stroke. To accomplish these aims, we used the distal middle cerebral artery occlusion +  
139 hypoxia mouse model of ischemic stroke in conjunction with immunohistochemistry,  
140 RNA-Seq, lipidomics, and behavioral analyses. Our resulting data indicate that,  
141 coincident with the substantial accumulation of infiltrating immune cells (Doyle et al.,  
142 2015; Zbesko et al., 2020), chronic stroke infarcts amass lipids, including  
143 sphingomyelins, cholesterol esters, and sulfatides. We also demonstrate that repeated  
144 administration of HP $\beta$ CD in young adult and aged mice attenuates immune cell and lipid  
145 accumulation within chronic stroke infarcts and improves recovery at transcriptional and  
146 functional levels. Therefore, HP $\beta$ CD has the potential to improve stroke recovery and  
147 prevent post-stroke dementia in humans.

148

## 149 **Materials and Methods**

150

### 151 ***Experimental design and statistical analysis***

152 Experiments were designed using power analyses to determine sample sizes based on  
153 expected variances and group differences. Statistical analyses were performed with  
154 Prism 6.0 (GraphPad). Data are presented as the mean  $\pm$  standard error of mean  
155 (SEM). Group sizes, statistical tests, and *p* values for each experiment are reported in  
156 **Table 1**. For GSEA, the normalized enrichment score (NES) is reported. The NES  
157 accounts for differences in gene set size and in correlations between gene sets. The  
158 NES is based on all dataset permutations to correct for multiple hypothesis testing.

159

160 **Mice**

161 Young adult (3- to 4-month-old) and aged (17- to 18-month-old) wild-type male  
162 C57BL/6J mice (Jackson Laboratory, Stock No. 000664) were used. Mice were housed  
163 in a temperature-controlled suite under a 12-hour light–dark regimen, with food and  
164 water available *ad libitum*. All procedures met NIH guidelines and were approved by the  
165 University of Arizona Institutional Animal Care and Use Committee. At each time point,  
166 mice were euthanized by isoflurane anesthesia (JD Medical), exsanguination, and  
167 subsequent intracardial perfusion with 0.9% saline. Whole brains or individual brain  
168 regions were then removed and either placed in RNAlater (Invitrogen, Cat. No.  
169 AM7020) for RNA sequencing analysis; flash frozen in liquid nitrogen for lipidomics  
170 analysis; or placed in a 4% paraformaldehyde (PFA) solution for 24 h before being  
171 transferred into a 30% sucrose solution for immunostaining analysis. Whole blood  
172 collected at the time of euthanasia was either placed directly in heparin-coated tubes for  
173 complete blood count analysis or extracted with sodium citrate to separate plasma via  
174 centrifugation.

175

176 **Stroke surgeries**

177 Stroke was induced in mice using the distal middle cerebral artery occlusion + hypoxia  
178 (DH) model. The DH stroke model generates a sizable infarct (24% of the ipsilateral  
179 hemisphere centered on the somatosensory cortex), has little variability, and has  
180 exceptional long-term survivability (Doyle et al., 2012; Nguyen et al., 2016). To induce  
181 stroke, we anesthetized animals by isoflurane inhalation and kept them at 37°C  
182 throughout the surgical procedure. For all experiments, we injected mice



183 subcutaneously (s.c.) with a single dose of buprenorphine hydrochloride (0.1 mg/kg;  
184 Henry Schein) and a single dose of cefazolin antibiotic (25 mg/kg; Sigma-Aldrich)  
185 dissolved in sterile saline. Following pre-operative preparation, the skull was exposed  
186 by creating a surgical incision in the skin and temporalis muscle. The right middle  
187 cerebral artery was visually identified, and a microdrill was used to expose it. The  
188 meninges were cut, and the vessel was cauterized using a small vessel cauterizer  
189 (Bovie Medical Corporation). Surgical wounds were closed using Surgi-lock 2oc tissue  
190 adhesive (Meridian Animal Health). We then immediately transferred mice to a hypoxia  
191 chamber (Coy Laboratory Products) containing 9% oxygen and 91% nitrogen for 45  
192 min. Sustained-release buprenorphine (Bup-SR, 1 mg/kg s.c.; ZooPharm) was  
193 administered 24 h after surgery as post-operative analgesia.

194

### 195 ***Drug treatment***

196 We injected HP $\beta$ CD or vehicle s.c. three times per week, beginning 7 days after stroke  
197 surgery, for 6 weeks until euthanasia at 7 weeks after stroke. Mice in the treatment  
198 group received 2-hydroxypropyl- $\beta$ -cyclodextrin powder (Sigma-Aldrich, Cat. No. H-107)  
199 dissolved in sterile phosphate-buffered saline (PBS) at a dose of 4 g HP $\beta$ CD/kg body  
200 weight. Mice in the vehicle control group received 300  $\mu$ L sterile PBS.

201

### 202 ***Immunostaining***

203 Coronal brain sections (40  $\mu$ m) were collected using a freezing Microm HM 450 sliding  
204 microtome (Thermo Fisher Scientific) and stored in cryoprotectant medium at  $-20^{\circ}$ C  
205 until processing. Immunostaining was performed on free-floating brain sections using

206 standard protocols (Doyle et al., 2015; Nguyen et al., 2016; Zbesko et al., 2018).  
207 Primary antibodies against neuronal nuclei (NeuN; 1:500; Millipore Sigma, Cat. No.  
208 MAB377; RRID:AB\_2298772), c-Fos (1:2000; Abcam, Cat. No. ab190289;  
209 RRID:AB\_2737414), CD3 $\epsilon$  (1:1000; BD Biosciences, Cat. No. 550277;  
210 RRID:AB\_393573), B220/CD45R (1:500; BD Biosciences, Cat. No. 553085;  
211 RRID:AB\_394615), immunoglobulin A (IgA; 1:1000; BioLegend, Cat. No. 407004;  
212 RRID:AB\_315079), and CD138 (Syndecan-1; 1:200; BioLegend, Cat. No. 142514;  
213 RRID:AB\_2562198) were used in conjunction with the appropriate secondary antibody  
214 and visualized using the VECTASTAIN Elite ABC Reagent, Peroxidase, R.T.U. (Vector  
215 Laboratories, Cat. No. PK-7100) and Vector DAB Substrate (3,3'-diaminobenzidine) Kit  
216 (Vector Laboratories, Cat. No. SK-4100). Secondary antibodies were diluted 1:400 for  
217 biotinylated horse anti-mouse IgG (Vector Laboratories, Cat. No. BA-2000;  
218 RRID:AB\_2313581), biotinylated goat anti-hamster IgG (Vector Laboratories, Cat. No.  
219 BA-9100; RRID:AB\_2336137), and biotinylated rabbit anti-rat IgG (Vector Laboratories,  
220 Cat. No. BA-4000; RRID:AB\_2336206). Sections were imaged using a Keyence BZ-  
221 X700 digital microscope with phase contrast, light, and fluorescence capabilities.

222

### 223 ***Oil Red O staining***

224 Frozen tissue sections were mounted on slides and allowed to dry. Mounted sections  
225 were dehydrated in 100% propylene glycol for 5 min and then stained with Oil Red O  
226 (ORO) for 10 min (Abcam, Cat. No. ab150678). The sections were then differentiated in  
227 85% propylene glycol for 3 min and rinsed with distilled water three times. Coverslips  
228 were applied to all slides using an aqueous mounting medium (Vector Laboratories,

229 Cat. No. H-1400). Stained sections were imaged with a Keyence BZ-X700 digital  
230 microscope.

231

### 232 ***Alcian blue staining***

233 Frozen tissue sections were mounted on slides and allowed to dry. Slides were  
234 immersed in eosin (VWR, Cat. No. 95057-848) and then rinsed eight times in PBS.  
235 Slides were incubated in 3% acetic acid (pH 2.5) for 3 min and then placed in a solution  
236 of 1% w/v Alcian Blue in 3% acetic acid (pH 2.5) for 30 min (EMD Millipore, Cat. No.  
237 TMS-010-C). Slides were then rinsed in 3% acetic acid and allowed to dry overnight.  
238 Slides were cleared in xylene and preserved with Entellan mounting medium (EMD  
239 Millipore, Cat. No. 14802) and coverslips. Stained sections were imaged with a Keyence  
240 BZ-X700 digital microscope.

241

### 242 ***Quantification of staining***

243 To quantify the amount of positive staining for CD3 $\epsilon$ , B220, Oil Red O, and Alcian blue,  
244 we used Fiji (Schindelin et al., 2012). The 'Colour Deconvolution' function was used to  
245 separate color channels in images of Alcian blue staining. We then converted all  
246 stitched images to 8-bit and traced the stroke infarct using the 'Polygon selections' tool.  
247 We applied a threshold of positive staining to each image and measured the pixel area  
248 of positive staining within the selected region. To quantify IgA and CD138, we utilized  
249 the 'Cell Counter' plugin to manually count the number of positive cells within the stroke  
250 infarct. To quantify NeuN and c-Fos immunoreactivity in vehicle- and HP $\beta$ CD-treated  
251 mice, we used Fiji to perform global thresholding in conjunction with a watershed

252 algorithm on the ipsilateral side and equivalent region in the contralateral hemisphere.  
253 Fields covering the selected regions were analyzed at bregma +0.38 mm and -1.46 mm  
254 (NeuN) or -1.82 mm (c-Fos) using a 20× objective lens. We also measured  
255 hippocampal area in images captured with a 2× objective lens by tracing the  
256 hippocampus with the 'Polygon selections' tool in Fiji.

257

### 258 ***RNA sequencing and data analysis***

259 Fresh brain tissue dissected from vehicle- and HP $\beta$ CD-treated mice was immersed in  
260 RNeasy (Qiagen, Cat. No. RNeasy) and delivered to the University of Arizona  
261 Genetics Core. Samples were assessed for quality with an Advanced Analytics  
262 Fragment Analyzer (High Sensitivity RNA Analysis Kit, Cat. No. DNF-491/User Guide  
263 DNF-491-2014AUG13) and quantity with a Qubit RNA HS Assay Kit (Cat. No. Q32852).  
264 Given satisfactory quality (RNA integrity number >8) and quantity, samples were used  
265 for library construction with the TruSeq Stranded mRNA Library Prep Kit from Illumina  
266 (Cat. No. 20020595), as well as the KAPA Dual-Indexed Adapter Kit from Roche (Cat.  
267 No. 8278555702). Upon completion of library construction, samples were assessed for  
268 quality and average fragment size with the Advanced Analytics Fragment Analyzer  
269 (High Sensitivity NGS Analysis Kit, Cat. No. DNF-846/User Guide DNF-486-  
270 2014MAR10). Quantity was assessed with an Illumina Universal Adaptor-specific qPCR  
271 kit from KAPA Biosystems (KAPA Library Quantification Kit for Illumina NGS, Cat. No.  
272 KK4824/KAPA Library Quantification Technical Guide – AUG2014). Following the final  
273 library quality control, samples were equimolar-pooled and clustered for paired-end  
274 sequencing on the Illumina NextSeq500 machine to generate 75 bp reads. The

275 sequencing run was performed using Illumina NextSeq500 run chemistry  
276 (NextSeq500/550 High Output v2 Kit 150 cycles, Cat. No. FC-404-2002). Sequencing  
277 data is publicly available at the National Center for Biotechnology Information through  
278 Gene Expression Omnibus accession numbers: GSE173544 and GSE173715. For data  
279 analysis, the resulting sequences were demultiplexed using bcl2fastq v2.19 (Illumina)  
280 and trimmed of their indexing adaptors using Trimmomatic v0.32 (Bolger, Lohse, &  
281 Usadel, 2014). The trimmed reads were aligned to the GRCh38 reference genome  
282 using STAR v2.5.2b (Dobin et al., 2013). Gene expression was calculated using the  
283 htseq-count function of the HTSeq python tool (Anders, Pyl, & Huber, 2015). Genes  
284 were annotated using the BioMart database. Differential expression analysis of count  
285 tables was performed using DESeq2 (Love, Huber, & Anders, 2014). Gene set  
286 enrichment analysis (GSEA) was performed on all significant differentially expressed  
287 genes (false discovery rate [FDR]-adjusted  $p < 0.05$ ) using a database of Gene  
288 Ontology (GO) terms for biological processes. Enrichment maps were constructed from  
289 GO terms using the Enrichment Map Cytoscape application (Merico, Isserlin, Stueker,  
290 Emili, & Bader, 2010). Minimal editing, such as repositioning of nodes and removal of  
291 repetitive gene-sets, was performed to optimize the map layout. Pathway analysis was  
292 performed on differentially expressed genes using Ingenuity Pathway Analysis v01-13  
293 (IPA).

294

### 295 ***Targeted lipidomics analysis (LIPID MAPS Lipidomics Core)***

296 Fresh brain tissue dissected from vehicle- and HP $\beta$ CD-treated mice was flash frozen  
297 and delivered to the LIPID MAPS Lipidomics Core at the University of California, San

298 Diego. Upon arrival, each sample underwent lipid extraction and quality control  
299 analyses. The comprehensive sphingolipid panel and cholesterol ester panel were  
300 independently performed using established protocols (Quehenberger et al., 2010).

301

### 302 ***Flow cytometry***

303 To assess peripheral immune cell populations, spleens were extracted after transcatheter  
304 perfusion with 0.9% saline. Each spleen was crushed in 1 mL ammonium–chloride–  
305 potassium RBC lysing buffer and resuspended in 1 mL complete DMEM. For cell  
306 staining, fluorophore-conjugated monoclonal antibodies specific for CD4 (RM4-5), CD8 $\alpha$   
307 (53-6.7), and TCR $\beta$  (H57-597) were obtained from BioLegend. Monoclonal antibodies  
308 specific for CD19 (6D5) and GL7 (GL7) were purchased from BD Pharmingen.

309 Antibodies against IgG1 (RMG1-1) and IgA (RMA-1) were obtained from BioLegend.

310 For intranuclear staining, buffers from a Foxp3 Staining Buffer Set (eBioscience) were  
311 used to stain antibodies recognizing Foxp3 (FJK-16s, eBioscience). Cells were run on a  
312 BD LSR II flow cytometer (BD Biosciences) and analyses were performed with FlowJo  
313 v10.7 for Windows (Tree Star).

314

### 315 ***Y-maze spontaneous alternation behavior test***

316 Spatial working memory was assessed with the spontaneous alternation behavior (SAB)  
317 paradigm. Testing occurred in a Y-shaped maze consisting of two symmetrical arms  
318 and one longer arm arranged at 120° angles (symmetrical arms: 7.5 cm wide, 37.0 cm  
319 long, 12.5 cm high; longer arm: 7.5 cm wide, 42.0 cm long, 12.5 cm high). Mice were  
320 placed at the end of the longest arm and allowed to freely explore the three arms in a 5

321 min trial, as described previously (Doyle et al., 2015). The number of arm entries and  
322 the number of correct alternations were recorded by an ANY-maze behavioral video  
323 tracking software (Stoelting, Co.). An entry was recorded when all four limbs of the  
324 mouse were within an arm.

325

### 326 ***Light/dark transition test***

327 The light/dark box arena consisted of a Plexiglas box (40 cm wide, 40 cm long, 35 cm  
328 high) divided by a small underpass into two equally sized compartments: a brightly  
329 illuminated zone (390 lux) and a covered dark zone (2 lux). Prior to the test, animals  
330 were habituated to the dark for 30 min. Mice were then placed in the dark chamber of  
331 the arena and allowed to move freely between the two chambers for 10 min. The time  
332 spent in each chamber, the latency to exit the dark chamber, and the total number of  
333 transitions were recorded by an ANY-maze behavioral video tracking software  
334 (Stoelting, Co.).

335

## 336 **Results**

337

### 338 ***Lipid composition of chronic stroke infarcts in young adult mice***

339 We previously reported that, similar to atherogenesis, chronic stroke infarcts  
340 accumulate foamy macrophages, cholesterol crystals, and lipid droplets, which results  
341 in the upregulation of osteopontin, MMPs, and pro-inflammatory cytokines (Chung et al.,  
342 2018). To further evaluate the similarities between the pathophysiology of chronic stroke  
343 infarcts and atherosclerosis, we evaluated lipid droplet accumulation in chronic stroke

344 infarcts. In the context of atherosclerosis, macrophages frequently become foamy in  
345 appearance due to the accumulation of cholesterol esters stored within lipid droplets. In  
346 addition to their role as storage containers within foamy macrophages, lipid droplets  
347 also contribute directly and indirectly to the pathology of progressing atherosclerotic  
348 plaques (Goldberg et al., 2018). To visualize lipid droplets in chronic stroke infarcts, we  
349 performed Oil Red O (ORO) staining on brain sections from young adult mice at 7  
350 weeks after stroke. ORO staining revealed more intracellular lipid droplets in infarcts  
351 compared to contralateral cortices (**Fig. 1A**). These findings provide additional evidence  
352 that chronic stroke infarcts and atherosclerotic plaques have a similar molecular and  
353 morphological profile.

354

355 To assess whether lipid accumulation in the infarct results from myelin breakdown  
356 following stroke, we performed Alcian blue staining on brain sections from young adult  
357 mice at 7 weeks post-stroke. Alcian blue stains for sulfatide, a major constituent of CNS  
358 myelin. Importantly, sulfatide was recently identified as a myelin-associated inhibitor of  
359 neurite outgrowth (Winzeler et al., 2011). Chronic stroke infarcts contained an  
360 abundance of sulfatides at 7 weeks after stroke (**Fig. 1B**), indicating that phagocytic  
361 cells, including resident microglia and infiltrating macrophages, are strained in their  
362 capacity to process and eliminate myelin lipid debris for at least 7 weeks after stroke.

363

364 To further evaluate myelin-derived lipids in chronic stroke infarcts, we performed  
365 targeted lipidomics analysis to assess sphingomyelin levels within infarcts compared to  
366 contralateral cortices of young adult mice at 7 weeks after stroke. Importantly,



367 sphingomyelins play a central role in the structure of myelin, constituting 4% of myelin  
368 lipid content. The accumulation of sphingomyelin is a hallmark of Niemann–Pick  
369 disease and leads to changes in the plasma membrane that promote  
370 neurodegeneration (Mar et al., 2016). Sphingomyelins are also involved in signal  
371 transduction pathways and in the regulation of cholesterol and protein trafficking to  
372 myelin (Poitelon, Kopec, & Belin, 2020). In addition to their role in myelin architecture,  
373 sphingomyelins are involved in microglial activation and inflammation (Fitzner et al.,  
374 2020; Yang, Hu, Yang, & Meng, 2020). Chronic stroke infarcts were enriched in  
375 sphingomyelins 7 weeks after stroke (**Fig. 1C**), indicating a pronounced dysregulation of  
376 myelin lipid homeostasis in chronic stroke infarcts of young adult mice.

377

### 378 ***Lipid composition of chronic stroke infarcts in aged mice***

379 Stroke remains the leading cause of long-term disability in people over the age of 65  
380 (Virani et al., 2020). Therefore, we used aged (18-month-old) mice to further  
381 characterize the lipid composition of chronic stroke infarcts. First, to corroborate our  
382 observations in young adult mice, we used ORO to stain for lipid droplets in brain  
383 sections collected from aged mice at 7 weeks after stroke. We observed significantly  
384 more intracellular lipid droplets in infarcts compared to contralateral cortices (**Fig. 2A**).  
385 In addition, Alcian blue staining revealed that chronic stroke infarcts are characterized  
386 by an abundance of sulfatides when compared with contralateral cortices at 7 weeks  
387 after stroke (**Fig. 2B**). When comparing these results with those obtained in young adult  
388 mice, we see that aged mice have a comparable accumulation of lipid droplets and  
389 sulfatides at 7 weeks after stroke.

390  
391 Cholesterol is esterified prior to storage in cytoplasmic lipid droplets to prevent free  
392 cholesterol-associated cell toxicity (Ghosh, Zhao, Bie, & Song, 2010). Therefore, we  
393 evaluated the composition of cholesterol esters stored in lipid droplets via targeted  
394 lipidomics analysis. For these analyses, we compared infarcts at 7 weeks after stroke to  
395 equivalent regions of the contralateral cortex. All quantified cholesterol ester species  
396 were significantly elevated in infarcts of aged mice at 7 weeks after stroke compared to  
397 contralateral cortices (**Fig. 2C**).

398

### 399 ***Transcriptome of the chronic stroke infarct in young adult mice***

400 To systematically characterize the chronic stroke infarct transcriptome, we conducted  
401 bulk RNA sequencing (RNA-Seq) on infarcts collected at 7 weeks after stroke and  
402 compared them to equivalent regions of the contralateral cortex (**Fig. 3A**). As expected,  
403 differential expression (DE) analysis revealed marked differences between infarcts and  
404 contralateral cortices. The resultant volcano plot illustrates the distribution of 3,930  
405 upregulated and 2,869 downregulated genes (**Fig. 3B**). The most significantly  
406 upregulated genes, including *Lpl*, *Spp1*, *Cd36*, *Mmp2*, and *Mmp19*, and the most highly  
407 enriched genes, including *Cd5l*, *Mmp3*, *Mmp12*, and *Mmp13*, indicate a pronounced  
408 disturbance in lipid homeostasis in infarcts at 7 weeks after stroke. Importantly, Zhu et  
409 al. (2017) similarly identified *Cd5l*, *Lpl*, and *Cd36* as highly expressed genes in foamy  
410 macrophages after spinal cord injury (SCI) (Zhu et al., 2017).

411

412 Correspondingly, chronic stroke infarcts were also characterized by an upregulation of  
413 TLRs, including *Tlr1*, *Tlr2*, and *Tlr4*, and scavenger receptors, including *Scarb2*, *Cd68*,  
414 *Msr1*, and *Cxcl16*. These genes are implicated in the induction and progression of  
415 atherosclerosis; importantly, these scavenger receptors mediate the uptake of oxLDL  
416 into macrophages and promote their differentiation into foam cells (Aslanian & Charo,  
417 2006; Febbraio, Hajjar, & Silverstein, 2001; Park, 2014; Rahaman et al., 2006; Zeibig et  
418 al., 2019). Dysregulated lipid homeostasis within infarcts is further evidenced by the  
419 upregulation of genes involved in lipid metabolism: *Npc1*, *Npc2*, *Lamp1*, *Ffar1*, *Pparg*,  
420 *ApoE*, *Trem2*, and *Abca1* (**Fig. 3C**).

421  
422 In addition to alterations in lipid metabolism, the transcriptome also revealed a signature  
423 of chronic inflammation at 7 weeks after stroke. For instance, activation of the innate  
424 immune response is indicated by the upregulation of genes involved in complement  
425 cascade activation, including *C1s1*, *C3ar1*, and *C3*, and in phagocytosis, including  
426 *Tmem119*, *Hexb*, *Nlrp3*, *Ctsb*, and *Myd88*. Further, upregulated genes included *Gfap*,  
427 *Lcn2*, and *Serpina3n*, which have been validated as specific markers of reactive  
428 astrogliosis in ischemic stroke and LPS-induced neuroinflammation (Zamanian et al.,  
429 2012) (**Fig. 3C**). Together, these genes signify the activation of innate immune cells,  
430 including infiltrating macrophages, resident microglia, and astrocytes.

431  
432 Additionally, activation of the adaptive immune system is indicated by the upregulation  
433 of genes associated with T lymphocytes, including *Cd2*, *Cd3e*, *Gzma*, *Gzmb*, and *Prf1*;  
434 B lymphocytes, including *CD19*, *Cd79a*, and *Blnk*; and antibody-producing plasma cells,

435 including *Sdc1* and *Jchain* (**Fig. 3C**). These perturbations in innate and adaptive  
436 immunity demonstrate that chronic inflammation persists in infarcts for at least 7 weeks  
437 after stroke, as we have shown previously (Chung et al., 2018; Doyle et al., 2015;  
438 Zbesko et al., 2020).

439  
440 In conjunction with the upregulation of genes involved in chronic inflammation and lipid  
441 metabolism, the DE analysis revealed a downregulation of genes involved in neuronal  
442 structure and function. Specifically, the neurofilament subunits *Nefh*, *Nefm*, and *Nefl*  
443 were downregulated, which indicates persistent disruption or absence of neuronal  
444 cytoskeletons in infarcts at 7 weeks after stroke (**Fig. 3C**).

445  
446 We then used IPA software to define upstream regulators and identify altered biological  
447 processes based on DE analysis. Differentially expressed genes were associated with  
448 the following upregulated biological processes: (i) atherosclerosis signaling, (ii) IL-1  
449 signaling, (iii) inflammasome pathway, (iv) eicosanoid signaling, (v) B cell receptor  
450 (BCR) signaling, and (vi) phospholipases, along with others. In contrast, differentially  
451 expressed genes were associated with the following downregulated biological  
452 processes: (i) calcium signaling, (ii) glutamate receptor signaling, and (iii) synaptic long-  
453 term potentiation (**Fig. 4A, B**). These altered biological processes indicate that the  
454 stroke infarct transcriptome is characterized by chronic inflammation, dysregulated lipid  
455 metabolism, and impaired or absent neuronal function at 7 weeks after stroke. In  
456 addition, IPA identified lipid metabolic upstream regulators such as cholesterol,

457 phospholipids, and LDL, as well as immunological upstream regulators such as MYD88,  
458 IL18, CD3, IL1B, TLR4, and TNF (**Fig. 4C**).

459

460 ***HP $\beta$ CD attenuates the chronic inflammatory response to stroke in young adult***  
461 ***mice***

462 To investigate the role of lipid metabolism in the chronic inflammatory response to  
463 stroke, we administered subcutaneous injections of 4 g/kg HP $\beta$ CD or vehicle control to  
464 young adult mice triweekly (Monday, Wednesday, and Friday) for 6 weeks, beginning 1  
465 week after stroke (**Fig. 5A**). We performed immunostaining on vehicle- and HP $\beta$ CD-  
466 treated brain sections at 7 weeks post-stroke. These analyses revealed substantially  
467 fewer B220+ B lymphocytes, CD3 $\epsilon$ + T lymphocytes, and CD138+ and IgA+ antibody-  
468 producing plasma cells in infarcts of HP $\beta$ CD-treated mice than in infarcts of vehicle-  
469 injected mice. In addition, ORO staining revealed that infarcts of HP $\beta$ CD-treated mice  
470 had fewer lipid droplets than those of vehicle-injected mice (**Fig. 5B**). These differences  
471 indicate that repeated administration of HP $\beta$ CD following stroke attenuates chronic  
472 inflammation and lipid droplet formation in young adult mice.

473

474 ***HP $\beta$ CD attenuates the chronic inflammatory response to stroke in aged mice***

475 Stroke prevalence and mortality rates increase with advancing age in both males and  
476 females (Virani et al., 2020). Therefore, to address age as a biological variable, we  
477 performed immunohistochemistry and bulk RNA-Seq analyses on aged (18-month-old)  
478 mice treated with HP $\beta$ CD using the same treatment regimen as in in young adult mice  
479 (HP $\beta$ CD or vehicle control three times per week for 6 weeks) (**Fig. 6A**). We discovered

480 that, consistent with young adult mice, aged mice had substantially fewer B220+ B  
481 lymphocytes, CD3 $\epsilon$ + T lymphocytes, and IgA+ antibody-producing plasma cells in  
482 infarcts following repeated administration of HP $\beta$ CD. In addition, ORO staining revealed  
483 that infarcts of HP $\beta$ CD-treated mice had significantly less lipid droplet accumulation  
484 than vehicle-injected mice at 7 weeks after stroke (**Fig. 6B**). When comparing these  
485 results with those obtained in young adult mice, we see that aged mice similarly exhibit  
486 attenuated lipid droplet and immune cell accumulation in chronic stroke infarcts  
487 following repeated administration of HP $\beta$ CD. Conversely, vehicle- and HP $\beta$ CD-treated  
488 aged mice displayed an equivalent accumulation of sulfatides in chronic stroke infarcts  
489 (**Fig. 6B**), suggesting that HP $\beta$ CD may not aid in the clearance of sulfatides.

490

491 ***HP $\beta$ CD does not alter peripheral immune cell populations in the blood or spleens***  
492 ***of aged mice after stroke***

493 The spleen, a secondary lymphoid organ, is a major reservoir of immune cells and a  
494 focal point for the immune response to tissue injury. In response to ischemic stroke,  
495 splenocytes enter into systemic circulation and migrate to the brain, exacerbating  
496 neurodegeneration (Seifert et al., 2012). To determine the effect of HP $\beta$ CD on immune  
497 activation at systemic sites, we used flow cytometry to quantify splenic cell populations.  
498 There were no significant differences in CD19+ B lymphocytes or GL-7+ germinal  
499 center B lymphocytes (**Fig. 7A, B**), or in IgG1 and IgA isotypes (**Fig. 7C**), between the  
500 spleens of vehicle- and HP $\beta$ CD-treated mice at 7 weeks after stroke. The CD4+ T  
501 lymphocyte, CD8+ T lymphocyte, and Treg populations were also not significantly  
502 altered by repeated HP $\beta$ CD administration (**Fig. 7D, E**). These results demonstrate that

503 splenic cell populations in HP $\beta$ CD-treated aged mice are not significantly altered in  
504 comparison to those of vehicle-injected mice.

505

506 A complete blood count analysis on blood collected from vehicle- and HP $\beta$ CD-treated  
507 aged mice at 7 weeks after stroke revealed no significant differences in the number of  
508 circulating white blood cells, neutrophils, lymphocytes, monocytes, eosinophils, or  
509 basophils (**Fig. 7F**). Together, the flow cytometry and complete blood count analyses  
510 indicate that, while there were substantially fewer immune cells in infarcts of HP $\beta$ CD-  
511 treated aged mice than in those of vehicle-injected mice at 7 weeks after stroke (**Fig.**  
512 **6B**), repeated systemic HP $\beta$ CD administration does not significantly alter circulating or  
513 splenic immune cell populations in aged mice.

514

515 ***HP $\beta$ CD promotes lipid metabolism and attenuates inflammation in infarcts of***  
516 ***aged mice after stroke***

517 We systematically characterized the transcriptomes of stroke infarcts in vehicle- and  
518 HP $\beta$ CD-treated aged mice by performing bulk RNA-Seq on infarcted brain tissue  
519 collected 7 weeks after stroke (**Fig. 8A**). As shown in the volcano and MA plots, the DE  
520 analysis revealed 991 upregulated genes and 1,876 downregulated genes (**Fig. 8B, C**).  
521 HP $\beta$ CD treatment upregulated intracellular cholesterol transporters, lipoproteins, and  
522 lipoprotein receptors, such as *Npc1*, *Npc2*, *ApoE*, *Trem2*, *Abca1*, *Vldlr*, and *Hdlbp*, and  
523 downregulated *Ffar1*, *Lrpb1*, and *Dgkb* (**Fig. 8D, E**). These alterations in lipid  
524 metabolism suggest that HP $\beta$ CD aids in the restoration of lipid homeostasis by 7 weeks  
525 after stroke. In addition, the DE analysis revealed a downregulation of genes involved in

526 chemotaxis, including *Cx3cr1*, *Cxcl5*, and *Ccr6*, and innate and adaptive immune  
527 responses, including *Mmd2*, *Mzb1*, *Btla*, *Jchain*, and *Igkv5-48*. Correspondingly, there  
528 was an upregulation of anti-inflammatory genes, such as *Tgfb1*, *Tgfb2*, *P2ry2*, and  
529 *Il18bp* (**Fig. 8D**). These results indicate that HP $\beta$ CD attenuates the chronic  
530 inflammatory response to stroke in aged mice.

531  
532 We also identified alterations in genes involved in the composition of membranes,  
533 including *Olig1*, *Pmp22*, *Mal2*, *Rftn1*, and *Plp*. These alterations suggest that HP $\beta$ CD  
534 modifies lipid rafts and cell membranes by 7 weeks after stroke. Genes involved in  
535 angiogenesis were also upregulated, including *Nrp1*, *Vash2*, *Hpse*, *Vegfc*, *Vegfd*, and  
536 *Ndnf* (**Fig. 8D**). In addition, enrichment maps constructed from GO terms revealed an  
537 upregulation of lipid metabolism, angiogenesis, and collagen synthesis pathways and a  
538 downregulation of immune response pathways (**Fig. 9A**). These results indicate that  
539 HP $\beta$ CD treatment promotes lipid metabolism and angiogenesis and dampens chronic  
540 inflammation in infarcts of aged mice at 7 weeks after stroke.

541  
542 Next, we performed genome-wide expression analysis of the RNA-Seq data using  
543 GSEA, which revealed significant enrichment of various biological processes in infarcts  
544 of HP $\beta$ CD-treated aged mice, including (i) collagen formation, (ii) regulation of  
545 angiogenesis, (iii) lipid catabolic process, (iv) regulation of autophagy, and (v) regulation  
546 of apoptotic process. Conversely, GSEA identified biological processes more enriched  
547 in infarcts of vehicle-injected mice compared to HP $\beta$ CD-treated mice, including (i) innate  
548 immune response, (ii) adaptive immune response, (iii) immunoglobulin production, (iv)



549 phagocytosis, engulfment, and (v) complement activation, classical pathway (**Fig. 9B**).

550 These results further indicate that infarcts of vehicle-injected mice are defined by  
551 increased innate and adaptive immune responses, whereas those of HP $\beta$ CD-treated  
552 mice are defined by increased angiogenic and lipid metabolic processes.

553

#### 554 ***Transcriptome of the peri-infarct region in aged mice at 7 weeks after stroke***

555 Prior to assessing the impact of repeated HP $\beta$ CD administration on the peri-infarct  
556 region of the brain, we first compared the transcriptome of the peri-infarct region to the  
557 equivalent region of the contralateral hemisphere in aged mice at 7 weeks after stroke  
558 (**Fig. 10A**). The peri-infarct region was characterized by 3,910 differentially expressed  
559 genes (**Fig. 10B, C**). Of these, 2,123 were upregulated, many of which were also  
560 upregulated in infarcts at 7 weeks after stroke (**Fig. 3C**). For instance, the infarct and  
561 peri-infarct regions were both defined by the upregulation of degradative enzymes,  
562 including *Mmp2*, *Mmp3*, and *Mmp8*; TLRs, including *Tlr1*, *Tlr2*, and *Tlr4*; and scavenger  
563 receptors, including *Cd36*, *Cd68*, and *Cxcl16*. Additionally, peri-infarct regions were  
564 characterized by specific markers of reactive astrogliosis, including *Gfap*, *Lcn2*, and  
565 *Serpina3n* (**Fig. 10D**).

566

567 Similar to the transcriptome of the infarct at 7 weeks after stroke, the transcriptome of  
568 the peri-infarct region was primarily defined by genes involved in chronic inflammation  
569 and dysregulated lipid metabolism. The upregulation of *Lpl*, *Lrp2*, *Ch25h*, *Apoe*, *Trem2*,  
570 and *Abca1* signifies a divergence from lipid homeostasis. Moreover, *Ldlr* was  
571 downregulated, which implies impaired lipoprotein and lipid metabolism (Go & Mani,

572 2012). In addition, genes involved in complement cascade activation (including *C1s1*,  
573 *C3ar1*, and *C3*) and phagocytosis (including *Tmem119*, *Hexb*, *Nlrp3*, and *Mmd2*) were  
574 upregulated in peri-infarct regions. These alterations in innate immunity coincided with  
575 corresponding perturbations in adaptive immunity. The upregulation of *Cd3d*, *Cd3e*,  
576 *Cd3g*, *Blnk*, *Sdc1* and *Jchain* suggests that chronic inflammation persists in peri-infarct  
577 regions for at least 7 weeks after stroke (**Fig. 10D**).

578

579 Conversely, the DE analysis revealed that 1,787 genes were downregulated in peri-  
580 infarct regions compared to equivalent regions of the contralateral hemisphere. These  
581 genes were primarily involved in mitochondrial respiration and neuronal function.

582 Specifically, genes involved in mitochondrial fission and respiration, including *Cyc1*,  
583 *Coa3*, *Cox5a*, and *Mff*, and the neurofilament subunits *Nefh*, *Nefm*, and *Nefl*, were  
584 downregulated (**Fig. 10D**). Together, these results demonstrate that the transcriptome  
585 of the peri-infarct region is characterized by the upregulation of genes involved in  
586 inflammation and lipid metabolism and the downregulation of genes involved in  
587 mitochondrial respiration and neuronal function.

588

589 Next, we performed genome-wide expression analysis of the RNA-Seq data using  
590 GSEA. GSEA revealed significant enrichment of various biological processes in peri-  
591 infarct regions of aged mice, including (i) macrophage activation, (ii) cytokine  
592 production, (iii) BCR signaling pathway, (iv) lipoprotein metabolism, and (v)  
593 phagocytosis. In contrast, GSEA identified biological processes more significantly  
594 enriched in equivalent regions of the contralateral hemisphere, including (i) synaptic

595 vesicle localization, (ii) mitochondrion organization, (iii) neurotransmitter secretion, (iv)  
596 myelin sheath, and (v) mitochondrial transport (**Fig. 11**). These results further indicate  
597 that peri-infarct regions are defined by chronic inflammation and dysregulated lipid  
598 metabolism, whereas equivalent regions of the contralateral hemisphere are defined by  
599 intact neuronal function.

600

601 ***HP $\beta$ CD attenuates inflammation and increases transcripts associated with***  
602 ***neuronal function in peri-infarct regions of aged mice after stroke***

603 To evaluate the impact of HP $\beta$ CD treatment on the transcriptome of the peri-infarct  
604 region, we performed bulk RNA-Seq on brain tissue collected 7 weeks after stroke. For  
605 this analysis, we compared the peri-infarct regions of vehicle- and HP $\beta$ CD-treated aged  
606 mice (**Fig. 12A**). The peri-infarct region of HP $\beta$ CD-treated mice was characterized by  
607 5,385 differentially expressed genes (**Fig. 12B, C**). The DE analysis revealed that  
608 specific markers of reactive astrogliosis, including *Gfap*, *Serpina3n*, and *Stat3*, were  
609 downregulated following HP $\beta$ CD treatment. The peri-infarct region of HP $\beta$ CD-treated  
610 mice was also characterized by the downregulation of multiple degradative enzymes,  
611 including *Mmp2*, *Mmp8*, and *Mmp14*; chemokine receptors, including *Ccr2*, *Cx3cr1*; and  
612 *Cxcr4*, and scavenger receptors, including *Cd36*, *Cd68*, and *Cxcl16* (**Fig. 12D**).

613

614 In addition, the transcriptomic analysis demonstrated a restoration of lipid homeostasis  
615 in peri-infarct regions of HP $\beta$ CD-treated mice compared to vehicle-injected mice, as  
616 evidenced by the downregulation of *Lipa*, *ApoE*, *Lamp1*, *Npc1*, and *Npc2* and  
617 upregulation of *Nceh1* and *Ldlr*. A reduction in the innate immune response (identified

618 by *Tlr4*, *Csf1*, and *C2*) and in the adaptive immune response (identified by *Sdc1*,  
619 *Gsdmd*, and *Cd1d1*) characterized peri-infarct regions of HP $\beta$ CD-treated mice (**Fig.**  
620 **12D**); these alterations are consistent with the attenuated chronic inflammation that  
621 characterized infarcts of the HP $\beta$ CD-treated aged mice (**Fig. 8D**). These results  
622 demonstrate that HP $\beta$ CD treatment after stroke attenuates chronic inflammation and  
623 promotes lipid metabolism in peri-infarct regions of aged mice. Additionally, the DE  
624 analysis revealed an upregulation of genes involved in myelin sheath structural integrity,  
625 such as *Ina*, *Omg*, and *Nefl*, and synaptic plasticity and neuroplasticity, such as *Syn1*,  
626 *Bdnf*, *Nrg1*, *Negr1*, and *Nsg1* (**Fig. 12D**). These results suggest that HP $\beta$ CD treatment  
627 improves the structure and function of neurons in peri-infarct regions of aged mice after  
628 stroke.

629  
630 Next, we performed genome-wide expression analysis of the RNA-Seq data using  
631 GSEA, which revealed a significant enrichment of various biological processes in peri-  
632 infarct regions of HP $\beta$ CD-treated aged mice, including (i) synaptic vesicle localization,  
633 (ii) neuron projection membrane, (iii) dendritic spine organization, (iv) myelin sheath,  
634 and (v) regulation of axonogenesis. Conversely, biological processes more significantly  
635 enriched in vehicle-injected mice than in HP $\beta$ CD-treated mice included (i) macrophage  
636 activation, (ii) binding and uptake of ligands by scavenger receptors, (iii) cytokine  
637 production, (iv) lipid droplet, (v) lymphocyte mediated immunity, and (vi) lipid catabolic  
638 process (**Fig. 13**). These results demonstrate that peri-infarct regions of HP $\beta$ CD-treated  
639 aged mice are characterized by enhanced membrane integrity and reduced  
640 inflammation compared to vehicle-injected aged mice.

641

642 ***HP $\beta$ CD attenuates neurodegeneration and improves recovery in aged mice after***

643 ***stroke***

644 To assess behavioral outcomes following HP $\beta$ CD treatment, we used the light/dark

645 transition test and the Y-maze spontaneous alternation behavior (SAB) test. The

646 light/dark transition test is based on the innate aversion of mice to brightly illuminated

647 areas and on their spontaneous exploratory behavior in response to mild stressors

648 (Bourin & Hascoët, 2003; Takao & Miyakawa, 2006). Our results revealed that in the

649 light/dark box, HP $\beta$ CD-treated mice spent less time in the brightly illuminated

650 compartment than vehicle-injected mice (**Fig. 14A**). Additionally, HP $\beta$ CD-treated mice

651 were slower to emerge from the dark compartment after being habituated to the dark for

652 30 min prior to the test (**Fig. 14A**). These behaviors indicate decreased impulsivity and

653 behavioral disinhibition in HP $\beta$ CD-treated mice. We also assessed hippocampal-

654 dependent spatial working memory at 7 weeks after stroke with the Y-maze SAB test

655 (Yamada et al., 1996). We discovered that vehicle-injected mice developed a delayed

656 cognitive deficit, whereas HP $\beta$ CD-treated mice displayed neurotypical cognitive function

657 comparable to baseline recordings (**Fig. 14B**). To assess hippocampal edema, we

658 measured the total hippocampal area of the ipsilateral and contralateral hemispheres in

659 aged mice that received vehicle or HP $\beta$ CD. Hippocampal enlargement 7 weeks after

660 stroke was attenuated in mice that had received HP $\beta$ CD (**Fig. 14C**). This reduction in

661 hippocampal edema correlates with improved hippocampal-dependent spatial working

662 memory outcomes in the Y-maze SAB test (**Fig. 14B**). We next evaluated secondary

663 neurodegeneration by quantifying NeuN immunoreactivity as a biomarker of secondary

664 neurodegeneration in regions of axonal degeneration. Repeated administration of  
665 HP $\beta$ CD led to the preservation of NeuN immunoreactivity in the striatum and thalamus  
666 (**Fig. 14D, E**). These results demonstrate that HP $\beta$ CD attenuates secondary  
667 neurodegeneration and improves cognitive function following stroke.

668

669 To investigate neuronal activation in hippocampal regions, we next measured the  
670 immunoreactivity of c-Fos, a transcription factor thought to primarily reflect NMDA-  
671 mediated neuronal activity (Albertini et al., 2018). We observed an induction of c-Fos  
672 expression in the dentate gyrus, CA1, and CA3 areas of HP $\beta$ CD-treated mice (**Fig.**  
673 **14F**). Importantly, Fleischmann et al. demonstrated a critical role for c-Fos in  
674 hippocampal-dependent spatial learning and memory, as well as in NMDA receptor-  
675 dependent LTP formation (Fleischmann et al., 2003). Together, our results show that  
676 improvement in hippocampal-dependent spatial working memory (**Fig. 14B**) correlates  
677 with an induction of c-Fos in hippocampal regions of HP $\beta$ CD-treated mice at 7 weeks  
678 after stroke.

679

680 To corroborate these findings, we further analyzed the results from the GSEA  
681 performed on peri-infarct regions from vehicle- and HP $\beta$ CD-treated aged mice (**Fig. 13**).  
682 We discovered that peri-infarct regions of HP $\beta$ CD-treated aged mice were characterized  
683 by enriched biological processes that signify improved neuronal and synaptic function,  
684 including (i) long-term synaptic potentiation, (ii) neurotransmitter transport, (iii) synaptic  
685 signaling, (iv) glutamate receptor activity, (v) membrane depolarization during action

686 potential, and (vi) learning or memory (**Fig. 14G**). These results provide evidence that  
687 HP $\beta$ CD improves neuronal integrity in peri-infarct regions by 7 weeks after stroke.

688

689 **Discussion (1,500 words maximum, including citations)**

690

691 Dysregulated lipid homeostasis has been implicated in chronic neurodegenerative  
692 diseases, including Alzheimer's disease, Parkinson's disease, and Niemann–Pick  
693 disease type C, and in acute neuronal injuries, including ischemic stroke (Vance, 2012).  
694 Lipid metabolism is particularly important in the mammalian brain, as lipids constitute  
695 50–60% of the dry weight (Luchtman & Song, 2013). Notably, the mammalian brain is  
696 highly enriched in cholesterol, which primarily exists in two distinct pools within the  
697 CNS: in plasma membranes of glial cells and neurons and in myelin sheaths  
698 surrounding axons. Due to the intact blood–brain barrier, cholesterol synthesis and  
699 lipoprotein transport are regulated independently of the peripheral circulation (Dietschy  
700 & Turley, 2001; Vance, 2012). Therefore, further investigation into the role of altered  
701 lipid metabolism in neurodegeneration will likely aid in the development of novel  
702 therapeutic strategies.

703

704 Our preclinical studies indicate that the pathological characteristics of chronic stroke  
705 infarcts closely resemble the hallmark features of atherosclerotic plaques. Similar to  
706 atherosclerotic plaques, chronic stroke infarcts contain foamy macrophages, lipid  
707 droplets, and intracellular and extracellular cholesterol crystals (Chung et al., 2018). We  
708 have also shown that the development of these pathologies coincides with the

709 recruitment and infiltration of adaptive immune cells (Doyle et al., 2015; Zbesko et al.,  
710 2020). Importantly, in atherogenesis, the formation of foamy macrophages, caused by  
711 dysregulated lipid metabolic processes, leads to the recruitment of adaptive immune  
712 cells and the production of cytokines and degradative enzymes. Herein, we postulated  
713 that following stroke, lipids derived from myelin debris and other cell membranes  
714 overwhelm the processing capability of phagocytes in the brain, leading to the formation  
715 of lipid-laden foam cells, generation of cholesterol crystals, secretion of pro-  
716 inflammatory cytokines, and production of degradative enzymes. Further, we  
717 hypothesized that this chronic inflammatory response, coupled with concurrent cell  
718 death, causes post-stroke secondary neurodegeneration and impairs functional  
719 recovery.

720

721 Using the distal middle cerebral artery occlusion + hypoxia mouse model of stroke, we  
722 first characterized the lipidome of chronic stroke infarcts. The lipidome of infarcts at 7  
723 weeks after stroke showed a substantial elevation of lipids, including sphingomyelins,  
724 sulfatides, and cholesterol esters, compared to contralateral cortices. We also observed  
725 an accumulation of intracellular lipid droplets. It has been shown that the excessive  
726 accumulation of cholesterol esters in lipid droplets contributes to foam cell formation  
727 (Yu, Fu, Zhang, Yin, & Tang, 2013). Therefore, the foam cells identified in chronic  
728 stroke infarcts likely contain an abundance of myelin-derived lipids.

729

730 Using transcriptomic analyses, we assessed the impact of lipid dyshomeostasis on  
731 chronic stroke infarcts and peri-infarct regions. We anticipated disparity between



732 ipsilateral and contralateral regions. Indeed, the transcriptomes of chronic stroke  
733 infarcts and peri-infarct regions were characterized by an upregulation of genes  
734 involved in inflammation, reactive astrogliosis, and lipid metabolism. Specifically, the  
735 upregulation of TLRs, including *Tlr1*, *Tlr2*, and *Tlr4*; scavenger receptors, including  
736 *Scarb2*, *Cd68*, *Msr1*, and *Cxcl16*; and other lipid mediators, including *Npc1*, *Npc2*,  
737 *Lamp1*, *Ffar1*, *Pparg*, *ApoE*, *Trem2*, and *Abca1* indicates a pronounced disruption in  
738 lipid homeostasis at 7 weeks after stroke. These transcriptomic analyses suggest that  
739 the mechanism of foam cell formation in ischemic stroke shares commonalities with the  
740 mechanism extensively characterized in atherosclerosis, albeit distinct in that myelin  
741 debris, rather than circulating LDL cholesterol, is the primary source of lipids that  
742 overwhelm the processing capacity of infiltrating macrophages and resident microglia.  
743  
744 We next assessed the efficacy of HP $\beta$ CD in counteracting or reversing foam cell  
745 formation and immune cell infiltration following stroke, as HP $\beta$ CD induces liver X  
746 receptor target gene expression in macrophages and leads to an increase in cholesterol  
747 transporters that further promote cholesterol efflux (Zimmer et al., 2016). Cyclodextrins  
748 are cyclic oligosaccharides comprised of glucose monomers. With hydrophobic interiors  
749 and hydrophilic exteriors, cyclodextrins can form inclusion complexes with hydrophobic  
750 compounds and yield aqueous solubility and stability across tissues. Cyclodextrins are  
751 commonly utilized as carriers and solubilizing agents for steroids, antivirals, and  
752 chemotherapies (Gidwani & Vyas, 2015; Rasheed, Kumar C.K., & Sravanthi, 2008). In  
753 addition, HP $\beta$ CD has also proven efficacious in the regression of atherosclerotic  
754 plaques and the prevention of age-related lipofuscin accumulation (Gaspar et al., 2017;

755 Zimmer et al., 2016). Here, we found that repeated administration of HP $\beta$ CD after  
756 stroke significantly attenuated chronic inflammation in young adult and aged mouse  
757 models. Specifically, there were substantially fewer intracellular lipid droplets, B  
758 lymphocytes, T lymphocytes, and antibody-producing plasma cells in the infarcts of  
759 young adult and aged HP $\beta$ CD-treated mice than in vehicle-injected mice at 7 weeks  
760 after stroke.

761  
762 We discovered that HP $\beta$ CD is effective in attenuating B-lymphocyte accumulation in  
763 chronic stroke infarcts, which suggests that HP $\beta$ CD has potential as a treatment for  
764 post-stroke dementia. We have shown that B lymphocytes mediate cognitive  
765 dysfunction following stroke (Doyle et al., 2015). Correspondingly, activated B  
766 lymphocytes and autoantibodies have been shown to cause neuropathology in models  
767 of experimental autoimmune encephalomyelitis (EAE), SCI, and transient middle  
768 cerebral artery occlusion (Ankeny, Lucin, Sanders, McGaughy, & Popovich, 2006;  
769 Ortega et al., 2015; Raine, Cannella, Hauser, & Genain, 1999). Recently, we also found  
770 that the production of natural IgA antibodies is a part of the B-lymphocyte response to  
771 stroke (Zbesko et al., 2020). However, future studies are required to determine if the  
772 function of these natural IgA antibodies is to aid in the clearance of myelin debris and  
773 the neutralization of apoptotic foamy macrophages.

774  
775 Using transcriptomic analyses, we next assessed transcripts in infarct and peri-infarct  
776 regions of HP $\beta$ CD-treated aged mice. We found that systemic administration of HP $\beta$ CD  
777 distinctively altered the transcriptomes of infarct and peri-infarct regions. In infarcts,

778 HP $\beta$ CD upregulated genes involved in lipid metabolic processes, including *Lipa*, *Npc1*,  
779 *ApoE*, and *Abca1*; in peri-infarct regions, HP $\beta$ CD had an inverse effect on these genes.  
780 These observations suggest that HP $\beta$ CD has supported the restoration of lipid  
781 homeostasis through transcriptional reprogramming of macrophages, consistent with a  
782 previously described mechanism of action (Zimmer et al., 2016). In addition, HP $\beta$ CD  
783 influenced expression profiles in infarcts through the upregulation of genes involved in  
784 angiogenesis and in peri-infarct regions through the upregulation of genes involved in  
785 neuronal and synaptic structure and function. Together, these results indicate that  
786 HP $\beta$ CD exerts multiple restorative effects on affected brain regions after stroke.

787  
788 We next evaluated the efficacy of HP $\beta$ CD in enhancing recovery after stroke. We  
789 assessed impulsivity and risk-taking behavior using the light/dark transition test. We  
790 have previously demonstrated a chronic impact of stroke on the psychological  
791 measurement of impulsivity in the light/dark transition test, resembling the uninhibited,  
792 risk-taking behaviors exhibited by patients with Alzheimer and frontotemporal dementias  
793 (Liscic, Storandt, Cairns, & Morris, 2007; Nguyen et al., 2018). HP $\beta$ CD-treated mice  
794 spent less time in the brightly illuminated chamber and were slower to exit the dark  
795 chamber. These behaviors suggest that HP $\beta$ CD-treated mice act less erratically and  
796 impulsively than vehicle-injected mice. We also measured hippocampal-dependent  
797 spatial working memory using the Y-maze spontaneous alternation behavior test. We  
798 found that vehicle-injected mice developed a delayed cognitive deficit, whereas HP $\beta$ CD-  
799 treated mice displayed neurotypical cognitive function. This improvement in recovery  
800 correlated with a reduction in hippocampal edema, a preservation of neurons in the

801 striatum and thalamus, and an induction of c-Fos expression in hippocampal regions  
802 (dentate gyrus, CA1, CA3). Correspondingly, peri-infarct regions of HP $\beta$ CD-treated  
803 mice were defined by an enrichment of biological processes signifying improved  
804 neuronal and synaptic integrity. Thus, administration of HP $\beta$ CD reduced stroke-induced  
805 neuropathology and improved cognitive function after stroke.

806

807 In conclusion, we have shown that, coincident with the progressive infiltration of  
808 adaptive immune cells, chronic stroke infarcts accumulate lipids, including  
809 sphingomyelins, sulfatides, and cholesterol esters. To our knowledge, this substantial  
810 disruption in lipid homeostasis has not been previously recognized or investigated in the  
811 context of stroke. We also discovered that repeated administration of HP $\beta$ CD following  
812 stroke aids in the restoration of lipid homeostasis, attenuates lipid droplet and immune  
813 cell accumulation, and improves recovery at transcriptional and functional levels.  
814 Therefore, we propose that HP $\beta$ CD could be repurposed for the treatment of ischemic  
815 stroke and other CNS injuries.

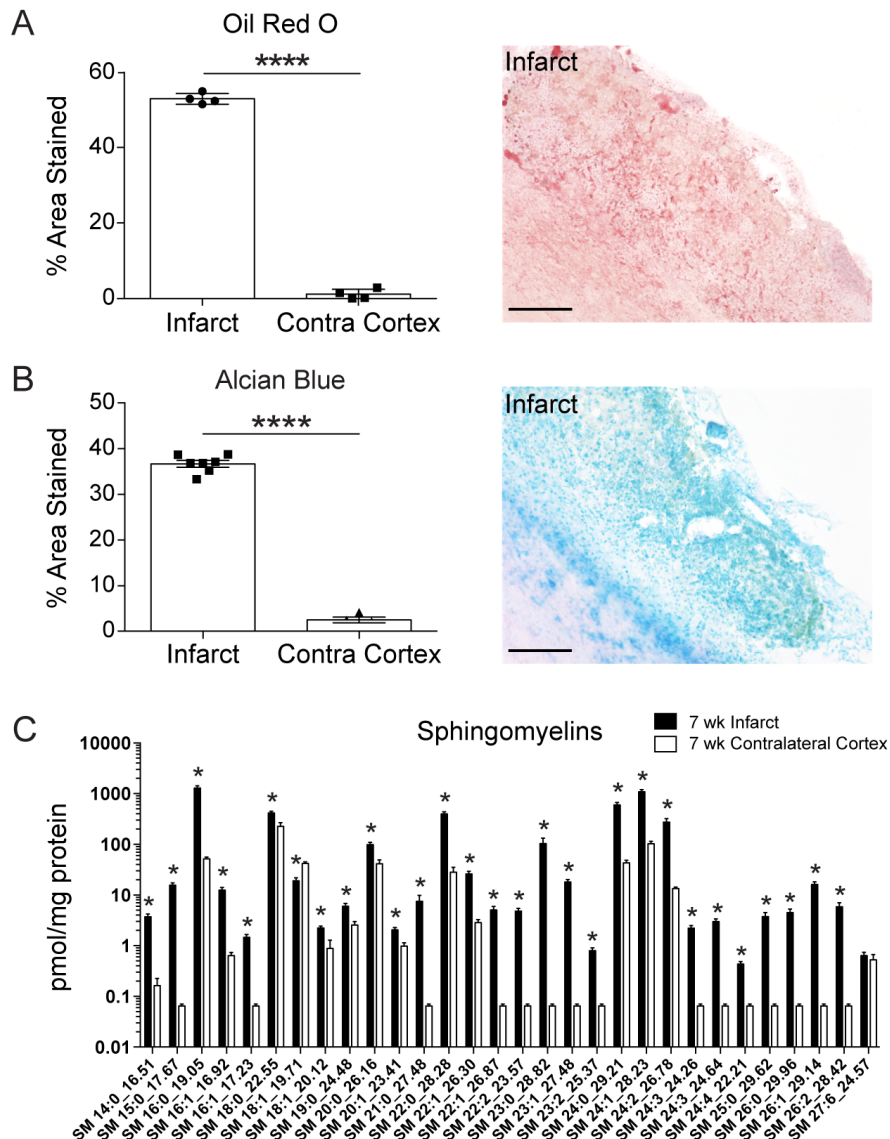

816

817 **Figure 1. Lipid composition of chronic stroke infarcts in young adult mice. A, B,**

818 Representative 20× images and quantification of positive staining with Oil Red O (**A**)

819 and Alcian blue (**B**) show markedly more lipid droplets and sulfatides, respectively, in

820 infarcts than in contralateral cortices. Scale bar, 125 μm. ( $n \geq 4$ ; paired (**A**) or unpaired

821 (**B**) *t* test; \*\*\*\* $p < 0.0001$ ). **C**, Targeted lipidomics analysis revealed that infarcts had

822 significantly higher levels of sphingomyelins than equivalent regions of the contralateral

823 cortex at 7 weeks after stroke. ( $n = 8$ ; multiple  $t$  tests, Holm–Sidak correction for multiple  
824 comparisons;  $*p < 0.05$ ). Data are presented as mean  $\pm$  SEM.

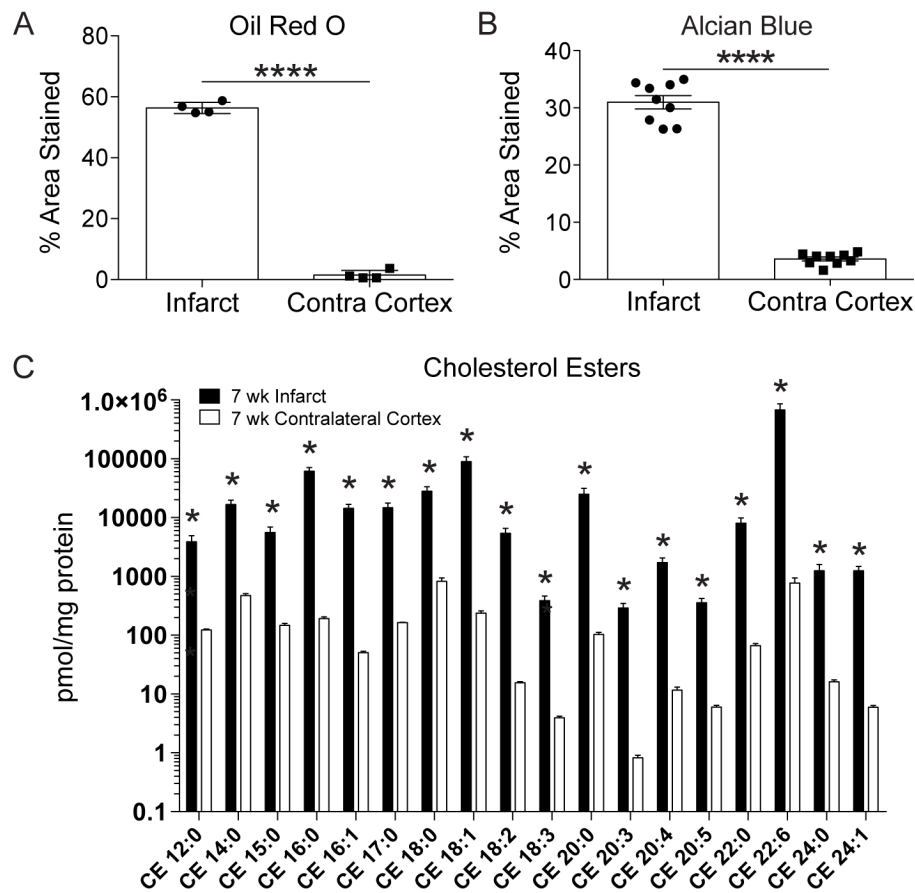

825

826 **Figure 2. Lipid composition of chronic stroke infarcts in aged mice. A, B,**

827 Quantification of positive staining with Oil Red O (**A**) and Alcian blue (**B**) shows

828 significantly more lipid droplets and sulfatides, respectively, in infarcts compared to

829 contralateral cortices. Scale bar, 125  $\mu$ m. ( $n \geq 4$ ; paired  $t$  tests; \*\*\*\* $p < 0.0001$ ).

830 Targeted lipidomics analysis revealed significantly higher levels of cholesterol esters in

831 infarcts than in equivalent regions of the contralateral cortex at 7 weeks after stroke. ( $n$

832 = 5; multiple  $t$  tests, Holm–Sidak correction for multiple comparisons; \* $p < 0.05$ ). Data

833 are presented as mean  $\pm$  SEM. CE, cholesterol ester.

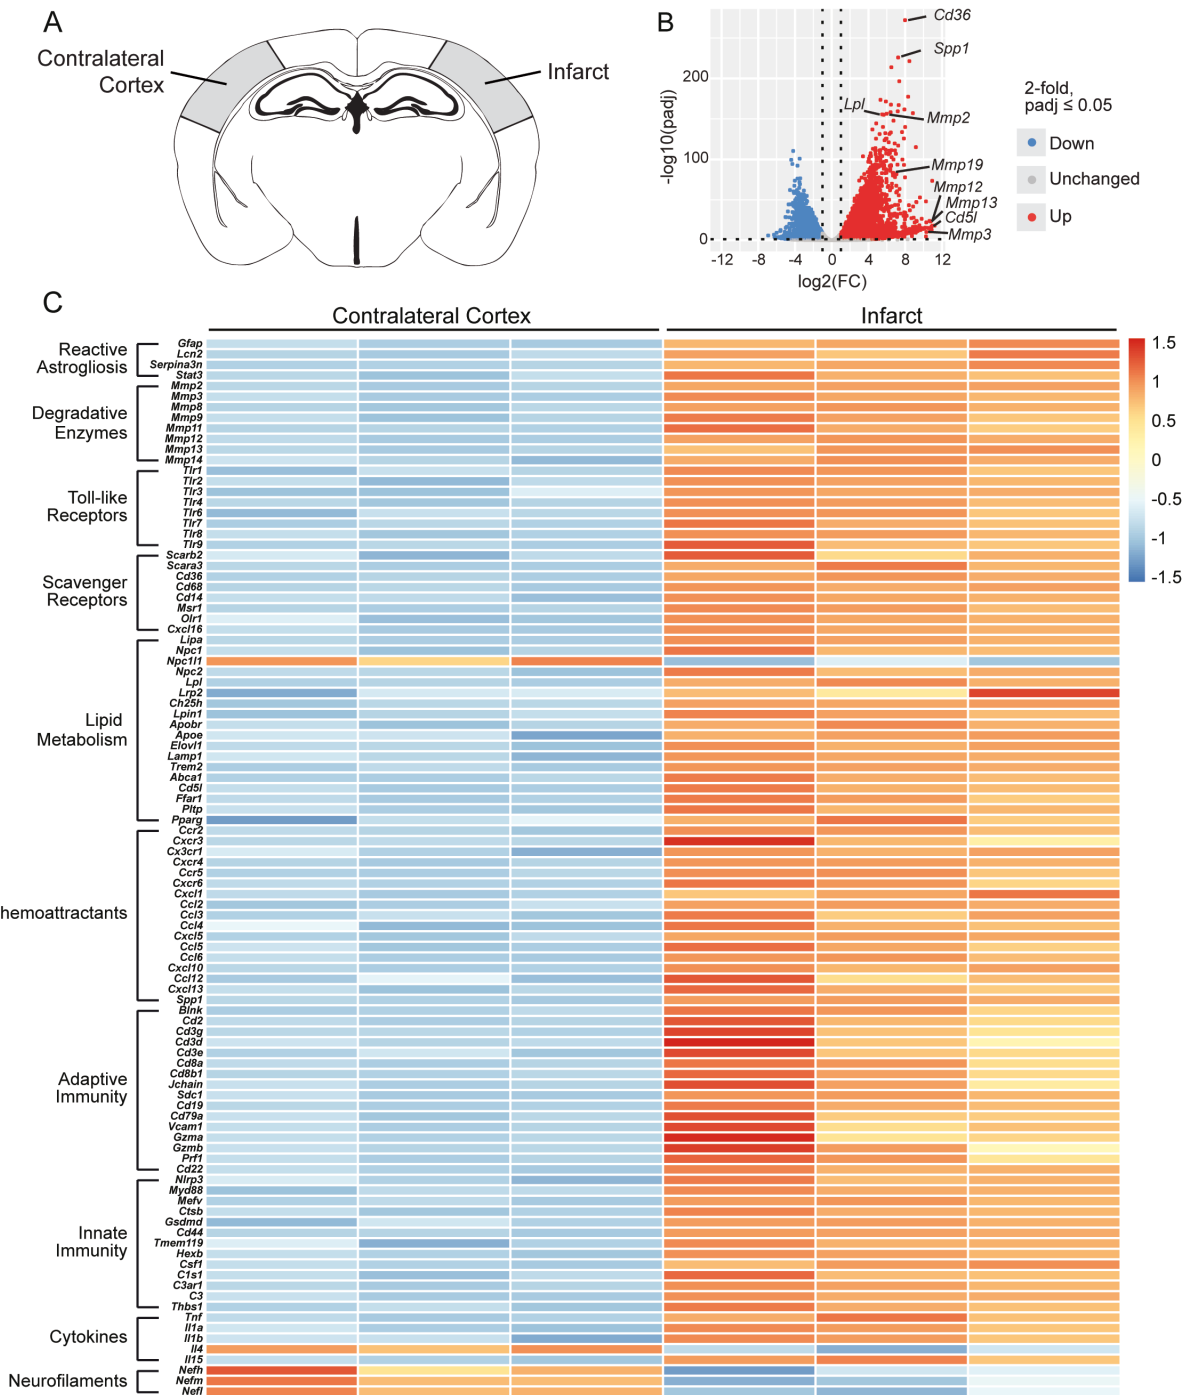

834

835 **Figure 3. Transcriptome of the chronic stroke infarct in young adult mice. A,**  
 836 Schematic of a mouse coronal brain section following stroke induced by distal middle  
 837 cerebral artery occlusion + hypoxia, with the analyzed region of each hemisphere



838 shaded in gray. **B**, Volcano plot showing differences in gene expression between the  
839 infarct and contralateral cortex at 7 weeks following stroke (false discovery rate-  
840 adjusted  $p < 0.05$ ;  $FC > |2|$ ). **C**, Row-scaled heatmap displaying differentially expressed  
841 genes associated with dysregulated lipid metabolism and pronounced inflammation  
842 (false discovery rate-adjusted  $p < 0.05$ ;  $FC > |2|$ ). FC, fold change.

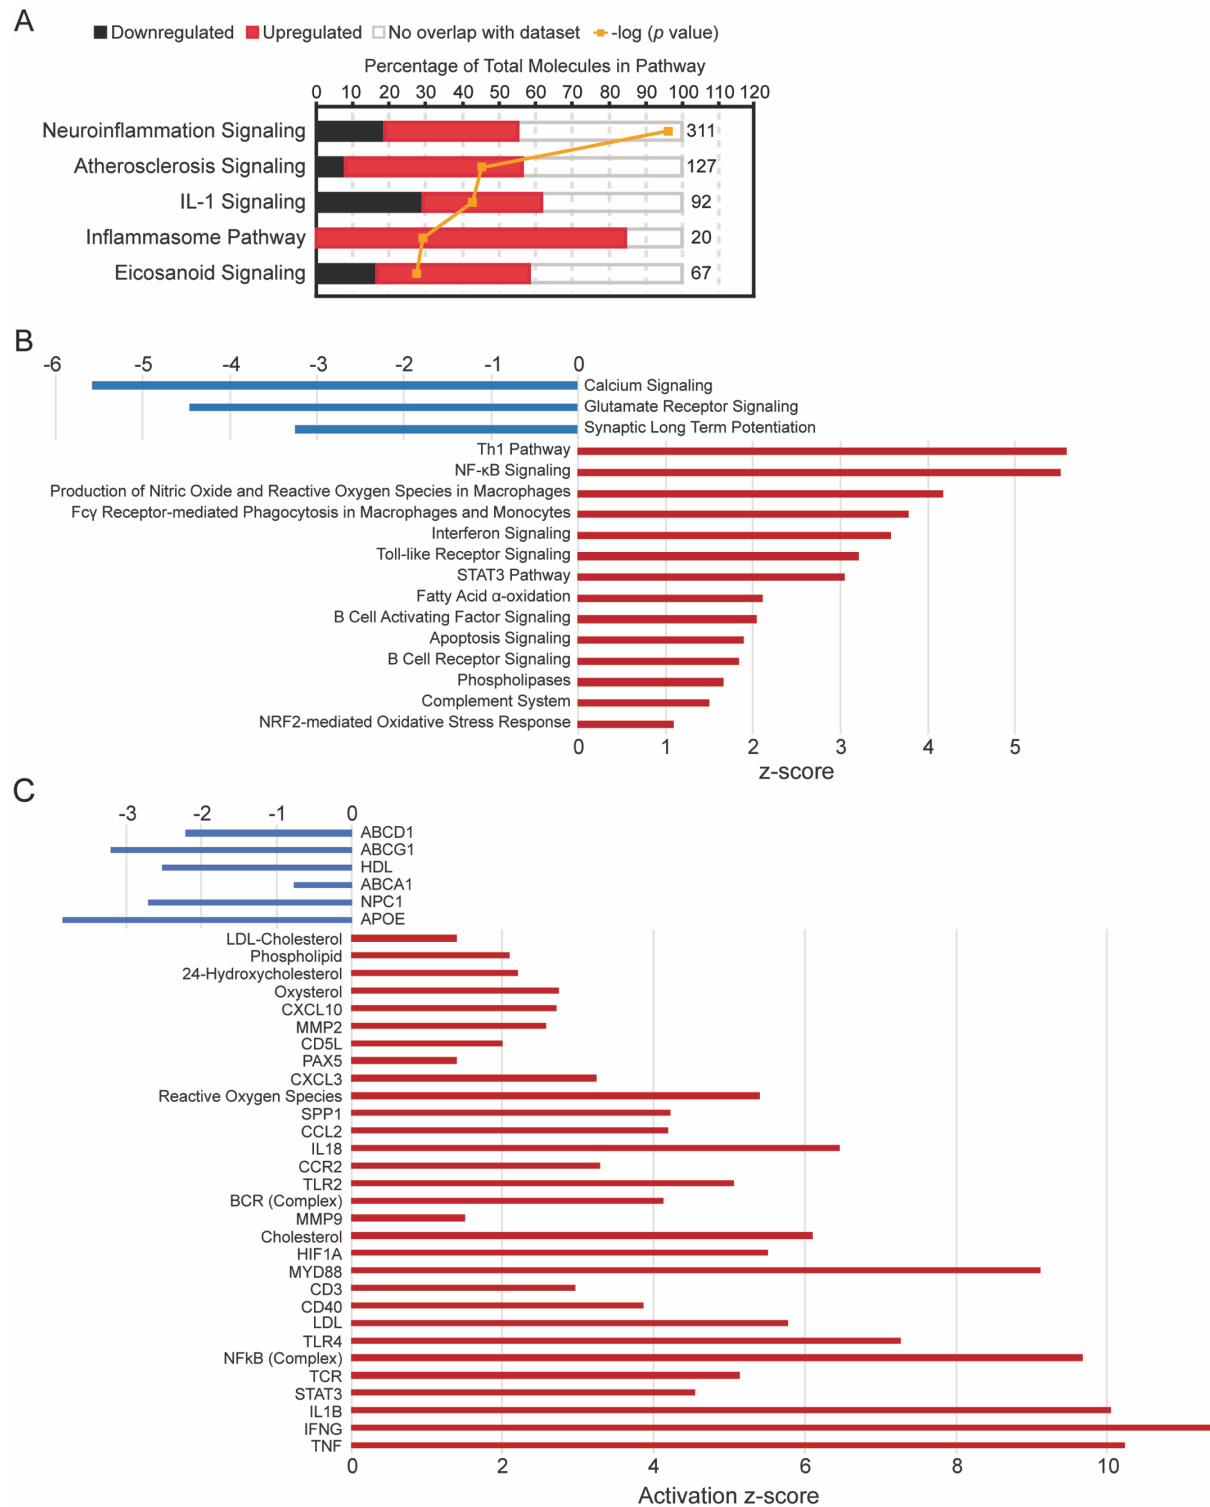

843

844 **Figure 4. Canonical pathways and upstream regulators based on differentially**

845 **expressed genes in chronic stroke infarcts of young adult mice. A, Ingenuity**

846 Pathway Analysis (IPA) performed on differentially expressed genes revealed a  
847 significant upregulation of inflammatory pathways in infarcts of young adult mice at 7  
848 weeks after stroke compared to contralateral cortices. **B**, Additional canonical pathway  
849 analysis confirmed activation of inflammatory pathways in the infarcts of young adult  
850 mice at 7 weeks after stroke. **C**, IPA identified putative upstream regulators associated  
851 with inflammation and lipid metabolism, including cholesterol, LDL, MYD88, CD3, and  
852 IL1B. All canonical pathways and upstream regulators shown are significantly up- or  
853 downregulated ( $p < 0.05$ ).

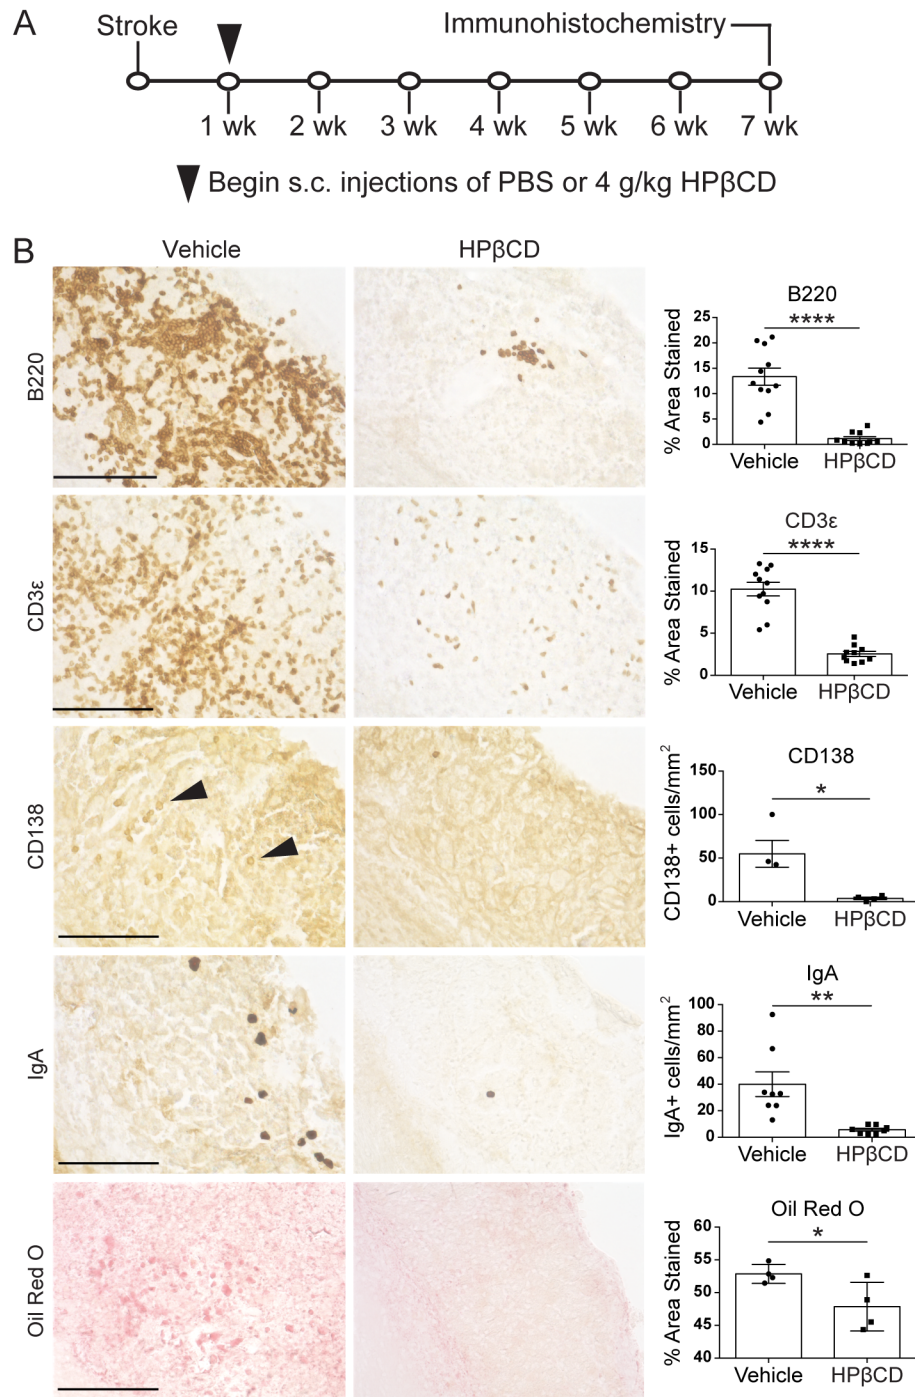

854

855 **Figure 5. HPβCD attenuates the chronic inflammatory response to stroke in**  
856 **young adult mice. A**, Experimental design,  $n = 31-32$  per group. Three-month-old  
857 mice received subcutaneous (s.c.) injections of 4 g/kg HPβCD or vehicle three times a

858 week, beginning 1 week after stroke induced by distal middle cerebral artery occlusion +  
859 hypoxia. Brains were extracted at 7 weeks post-stroke and processed for  
860 immunohistochemistry. **B**, Representative 40× images of infarcts in vehicle- or HPβCD-  
861 treated young adult mice stained for B lymphocytes (B220), T lymphocytes (CD3ε),  
862 antibody-producing plasma cells (CD138, IgA) and lipid droplets (Oil Red O).  
863 Quantification of images is shown to the right of each photomicrograph. ( $n = 4-11$ ;  
864 unpaired  $t$  tests;  $*p < 0.05$ ,  $**p < 0.01$ ,  $****p < 0.0001$ ). Scale bar, 125 μm. Data are  
865 presented as mean ± SEM.

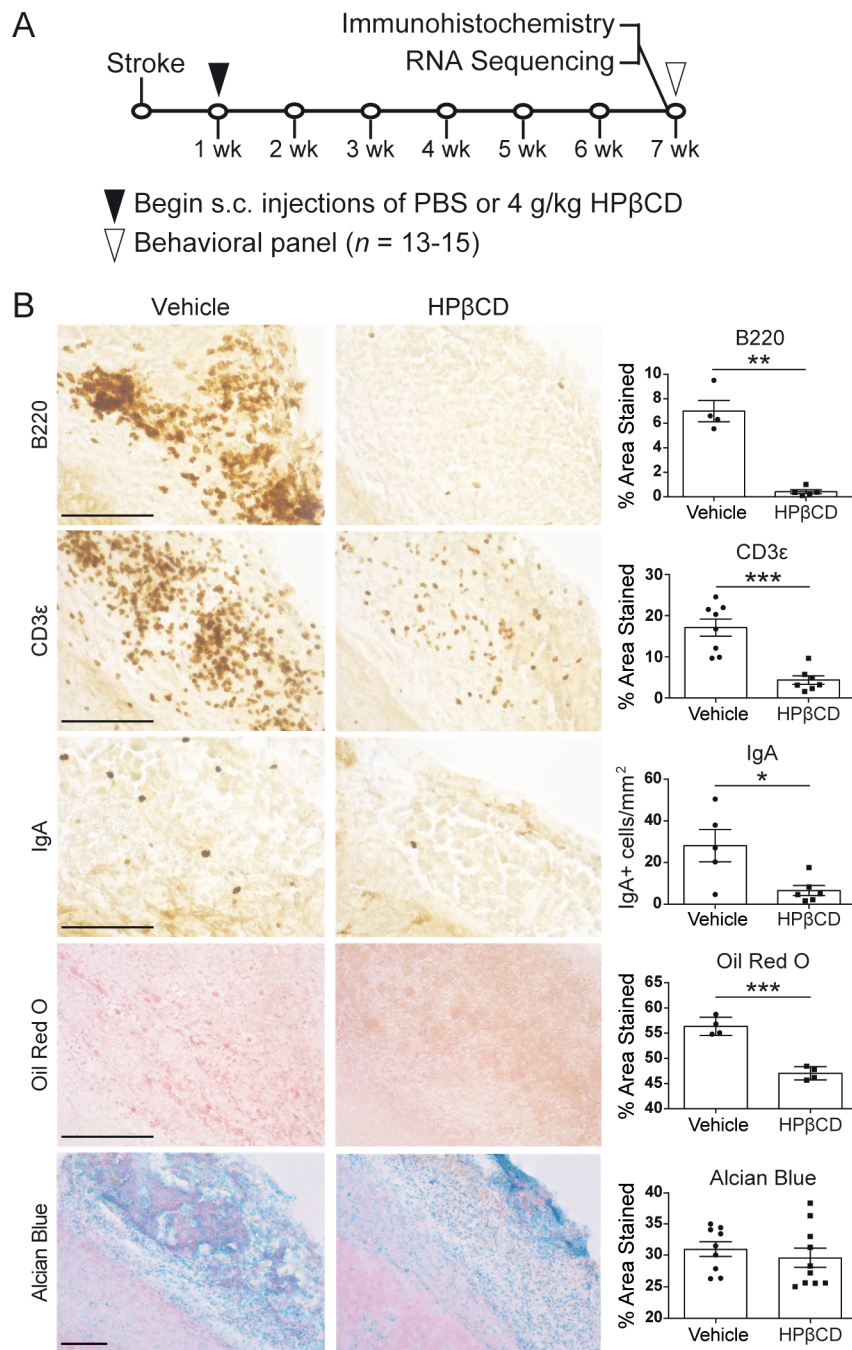

866

867 **Figure 6. HPβCD attenuates the chronic inflammatory response to stroke in aged**

868 **mice. A**, Experimental design, *n* = 39–40 per group. Eighteen-month-old mice received

869 subcutaneous (s.c.) injections of 4 g/kg HPβCD or vehicle three times a week,

870 beginning 1 week after stroke induced by distal middle cerebral artery occlusion +

871 hypoxia. Brains were dissected at 7 weeks post-stroke and processed for  
872 immunohistochemistry or RNA-Seq. **B**, Representative 40× images of infarcts in  
873 vehicle- or HPβCD-treated aged mice stained for B lymphocytes (B220), T lymphocytes  
874 (CD3ε), antibody-producing plasma cells (IgA), and lipid droplets (Oil Red O), followed  
875 by representative 20× images of infarcts stained for sulfatides (Alcian Blue).  
876 Quantification of images is shown to the right of each photomicrograph. ( $n = 4-10$ ;  
877 unpaired  $t$  tests;  $*p < 0.05$ ,  $**p < 0.01$ ,  $***p < 0.001$ ). Scale bar, 125 μm. Data are  
878 presented as mean ± SEM.

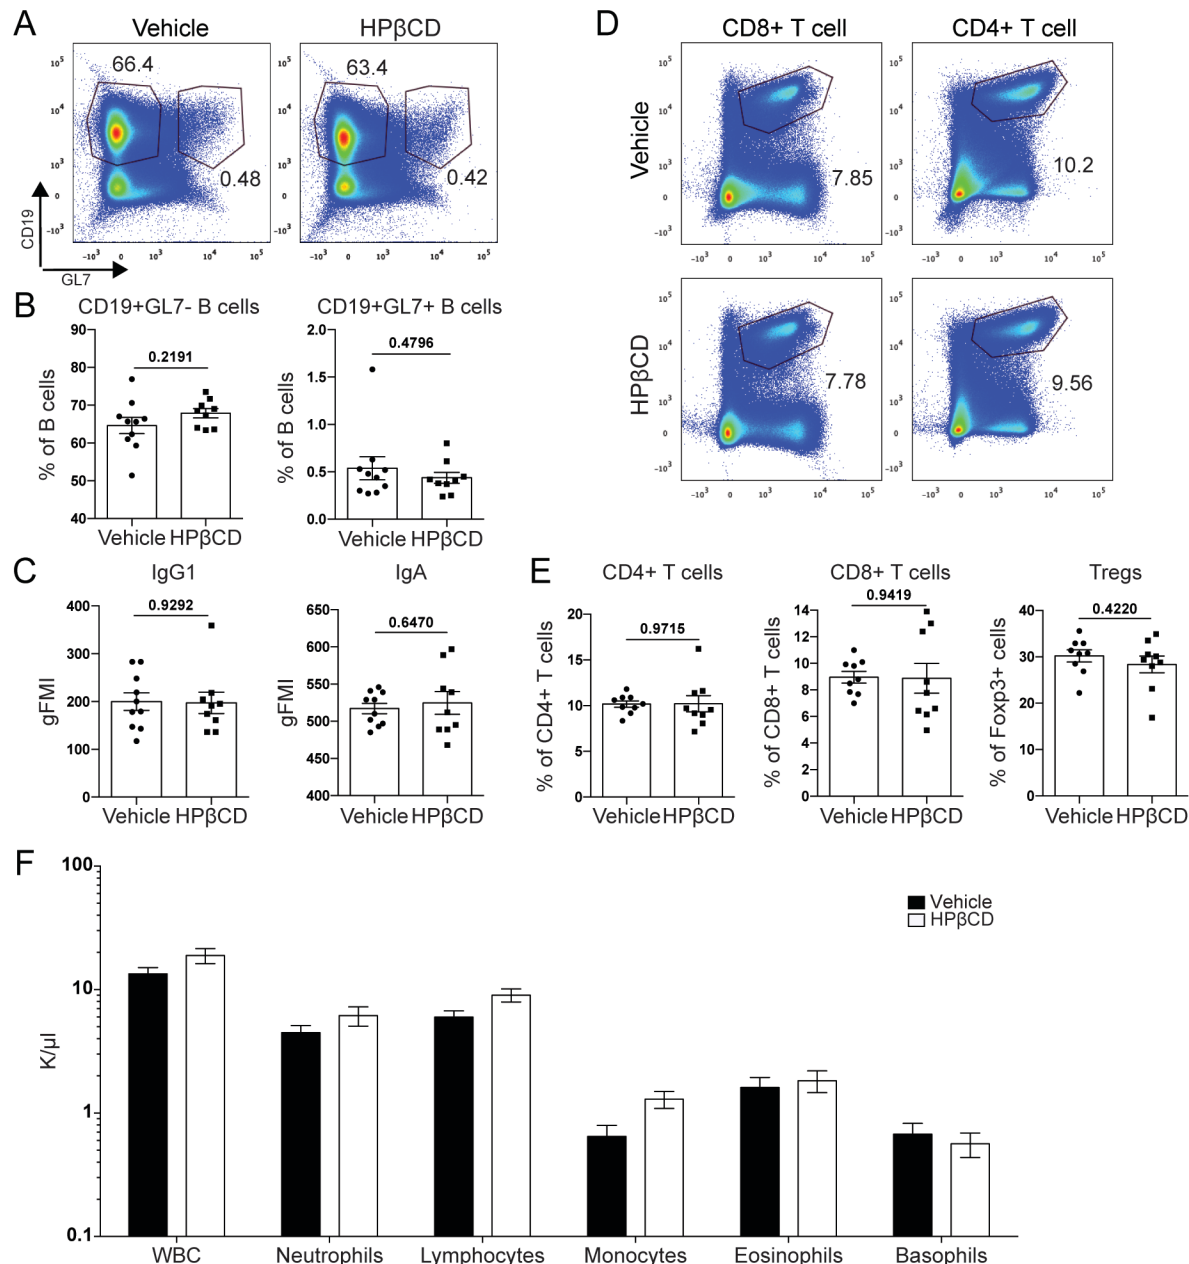

879

880 **Figure 7. HPβCD does not alter peripheral immune cell populations in the blood**  
 881 **or spleens of aged mice after stroke. A, B,** Splenocytes from HPβCD- and vehicle-  
 882 injected aged mice were stained with antibodies against CD19 and GL7. Representative  
 883 flow cytometry plots (**A**) and quantification of CD19+GL7- B cells and CD19+GL7+  
 884 germinal center B cells as a percentage of total lymphocytes (**B**) showed no significant



885 differences in splenic B cell populations between vehicle- and HP $\beta$ CD-treated aged  
886 mice at 7 weeks after stroke. **C**, Quantification of antibody isotypes (IgG1 and IgA) in  
887 the spleen revealed no significant differences between vehicle- and HP $\beta$ CD-treated  
888 aged mice at 7 weeks after stroke. **D, E**, Splenocytes from HP $\beta$ CD- and vehicle-injected  
889 aged mice were stained with antibodies against TCR $\beta$ , CD4, CD8, and Foxp3.  
890 Representative flow cytometry plots of CD4+ and CD8+ T cells (**D**) and quantification of  
891 CD4+ T cells, CD8+ T cells, and Tregs as a percentage of total lymphocytes (for CD4+  
892 and CD8+ gates) or TCR $\beta$ +CD4+ T cells (for Treg gate) (**E**) revealed no significant  
893 differences in splenic T cell populations between vehicle- and HP $\beta$ CD-treated aged  
894 mice at 7 weeks after stroke. ( $n = 9-10$ ; unpaired  $t$  tests;  $*p < 0.05$ ). **F**, Complete blood  
895 count analysis in vehicle- and HP $\beta$ CD-treated aged mice at 7 weeks after stroke  
896 revealed no significant differences in circulating immune cell populations ( $n = 6$ ; multiple  
897  $t$  tests, Holm–Sidak correction for multiple comparisons;  $*p < 0.05$ ). Data are presented  
898 as mean  $\pm$  SEM. GC, germinal center.

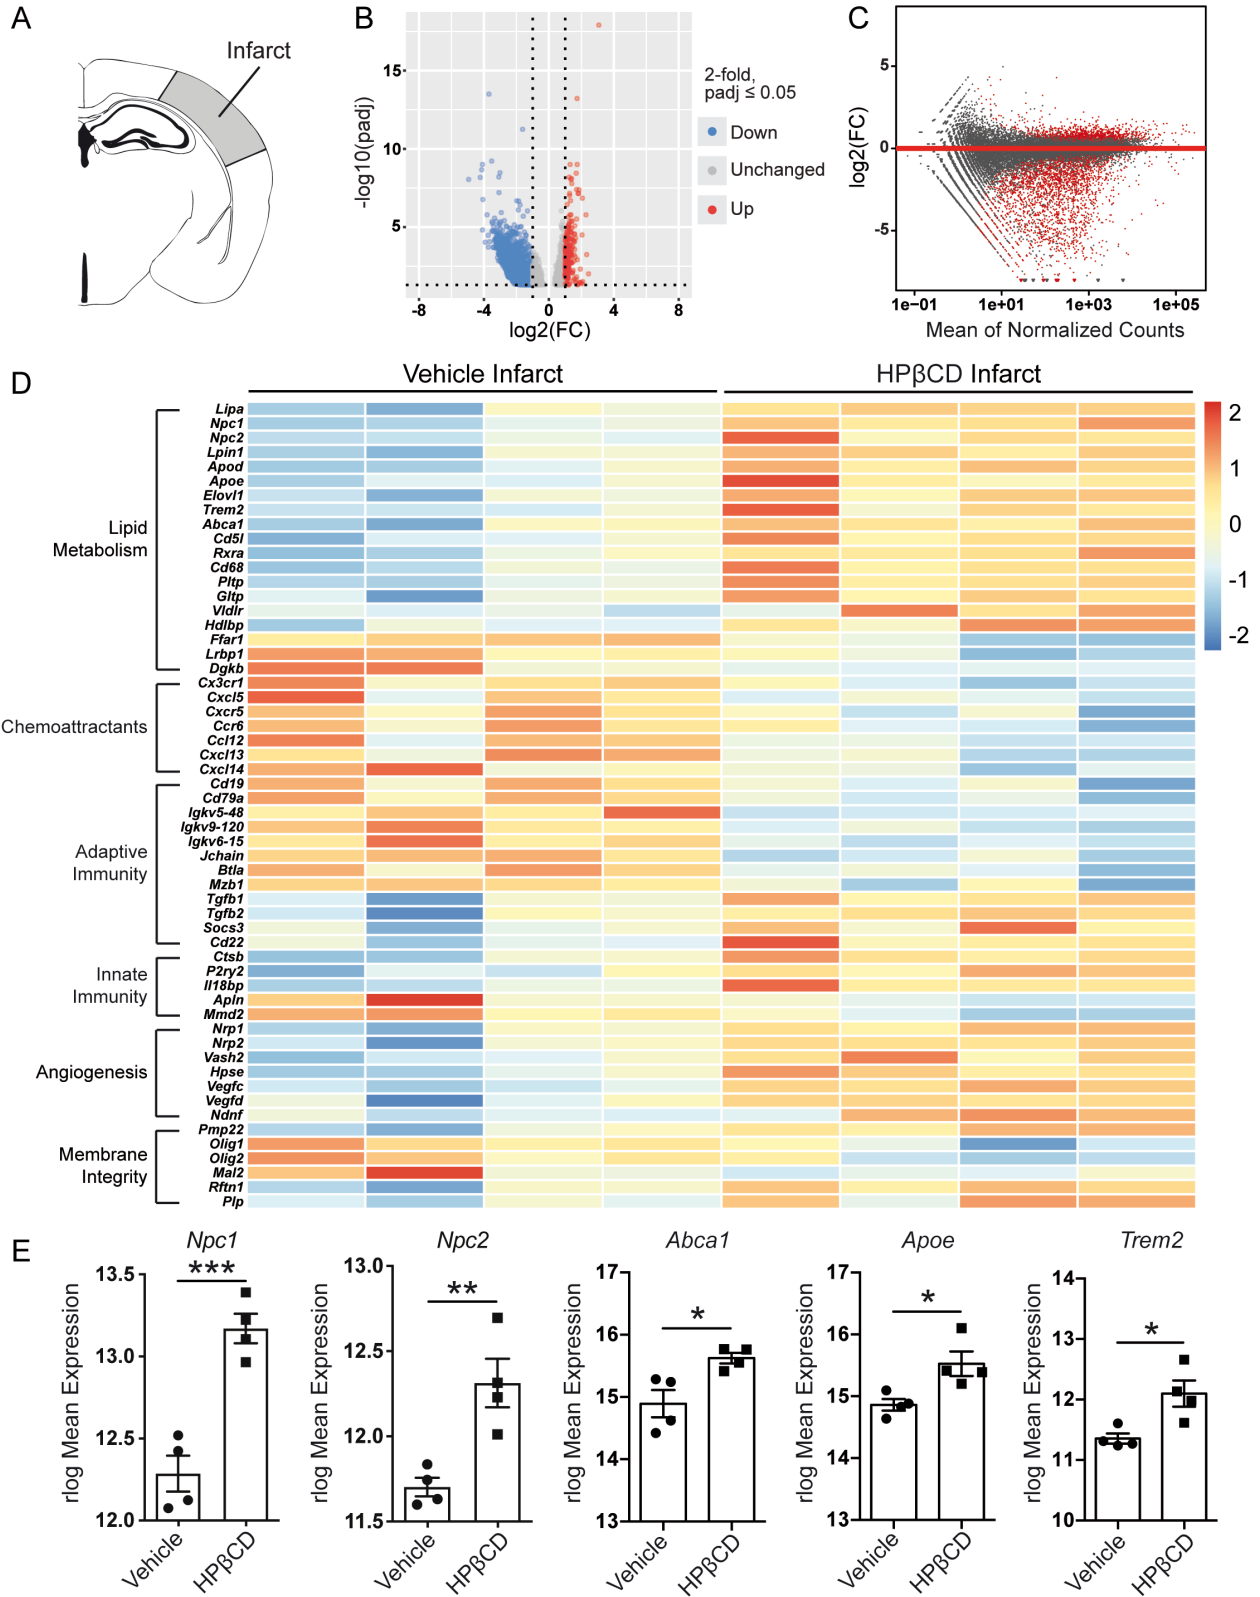

900 **Figure 8. HPβCD promotes lipid metabolism and attenuates inflammation in**  
901 **infarcts of aged mice after stroke. A,** Schematic of a mouse coronal brain section  
902 following stroke induced by distal middle cerebral artery occlusion + hypoxia, with the  
903 analyzed region shaded in gray. **B, C,** Volcano (**B**) and MA (**C**) plots constructed from  
904 count data show differences in gene expression between infarcts from vehicle- and  
905 HPβCD-treated mice at 7 weeks after stroke (false discovery rate-adjusted  $p < 0.05$ ; FC  
906  $> |2|$ ). **D,** Row-scaled heatmap displaying differentially expressed genes associated with  
907 lipid metabolism, inflammation, and angiogenesis (false discovery rate-adjusted  $p <$   
908  $0.05$ ; FC  $> |2|$ ). **E,** Graphs representing rlog-normalized expression of selected genes  
909 related to lipid metabolism. ( $n = 4$ ; unpaired  $t$  tests;  $*p < 0.05$ ,  $**p < 0.01$ ,  $***p < 0.001$ ).  
910 FC, fold change.

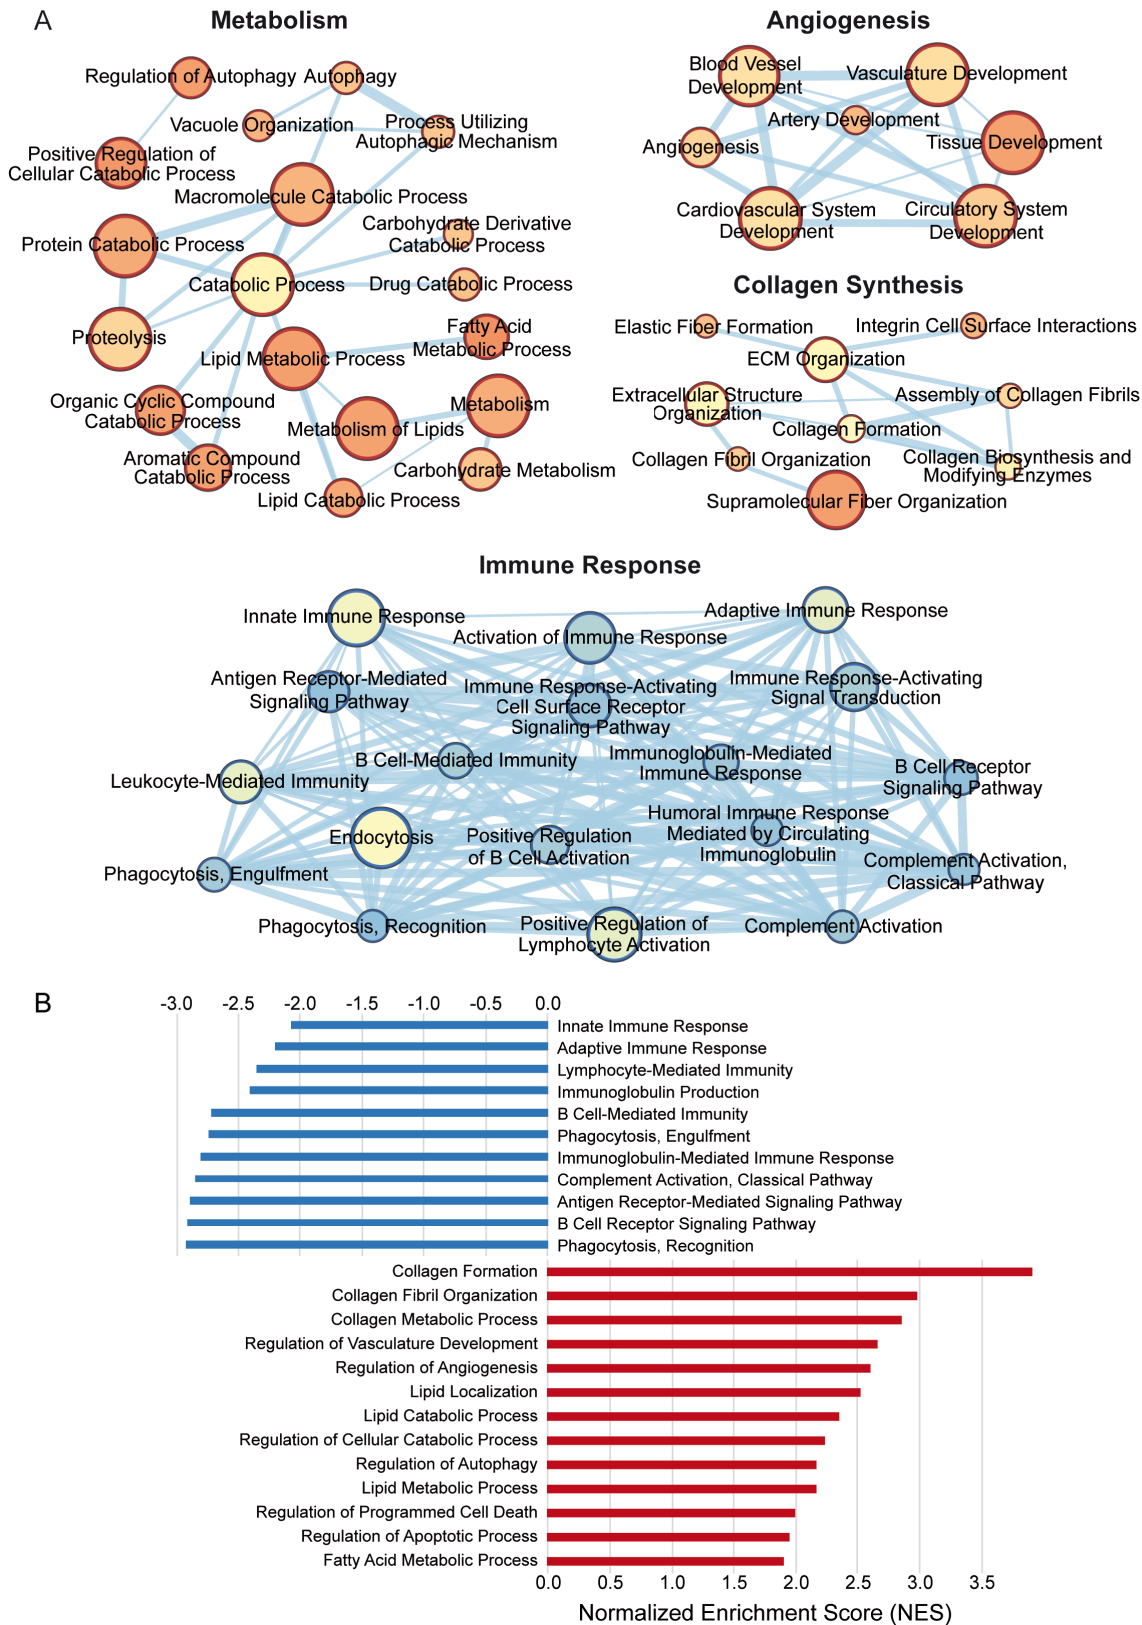

912 **Figure 9. Biological processes enriched in infarcts of HP $\beta$ CD-treated aged mice at**  
913 **7 weeks after stroke. A,** Enrichment maps constructed from Gene Ontology terms  
914 revealed a significant upregulation of metabolism, angiogenesis, and collagen synthesis  
915 pathways and a significant downregulation of immune response pathways. Pathways  
916 are shown as circles (nodes) that are connected with lines (edges) if the pathways  
917 share genes. Node colors are based on the enrichment score, and edge sizes are  
918 based on the number of genes shared by the connected pathways. **B,** Gene set  
919 enrichment analysis (GSEA) revealed significant enrichment of various biological  
920 processes in the infarcts of HP $\beta$ CD-treated aged mice, depicted in red. Conversely,  
921 GSEA identified biological processes more significantly enriched in the infarcts of  
922 vehicle-injected mice compared to HP $\beta$ CD-treated mice, depicted in blue.

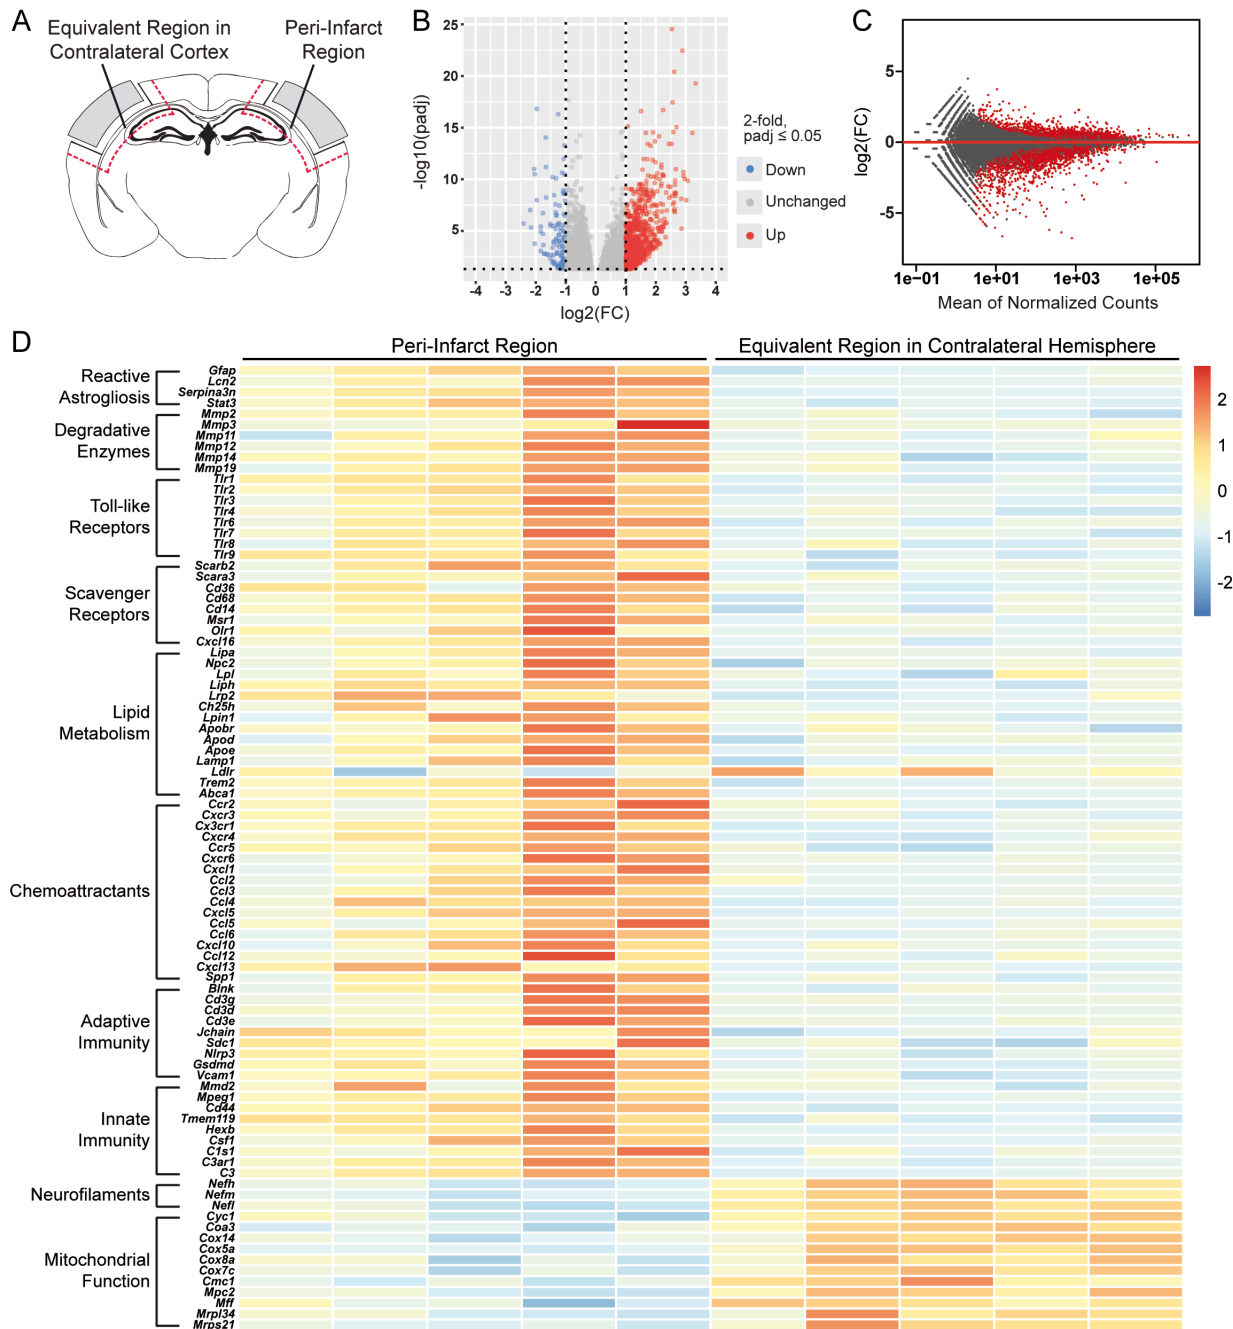

923

924 **Figure 10. Transcriptome of the peri-infarct region in aged mice at 7 weeks after**

925 **stroke. A**, Schematic of a mouse coronal brain section following stroke induced by

926 distal middle cerebral artery occlusion + hypoxia, with analyzed regions indicated. **B**, **C**,

927 Volcano (**B**) and MA (**C**) plots constructed from count data show differences in gene

928 expression between peri-infarct regions and equivalent regions in the contralateral  
929 cortex at 7 weeks after stroke (false discovery rate-adjusted  $p < 0.05$ ;  $FC > |2|$ ). **D**, Row-  
930 scaled heatmap displaying differentially expressed genes associated with lipid  
931 metabolism, inflammation, and mitochondrial function (false discovery rate-adjusted  $p <$   
932  $0.05$ ;  $FC > |2|$ ). FC, fold change.

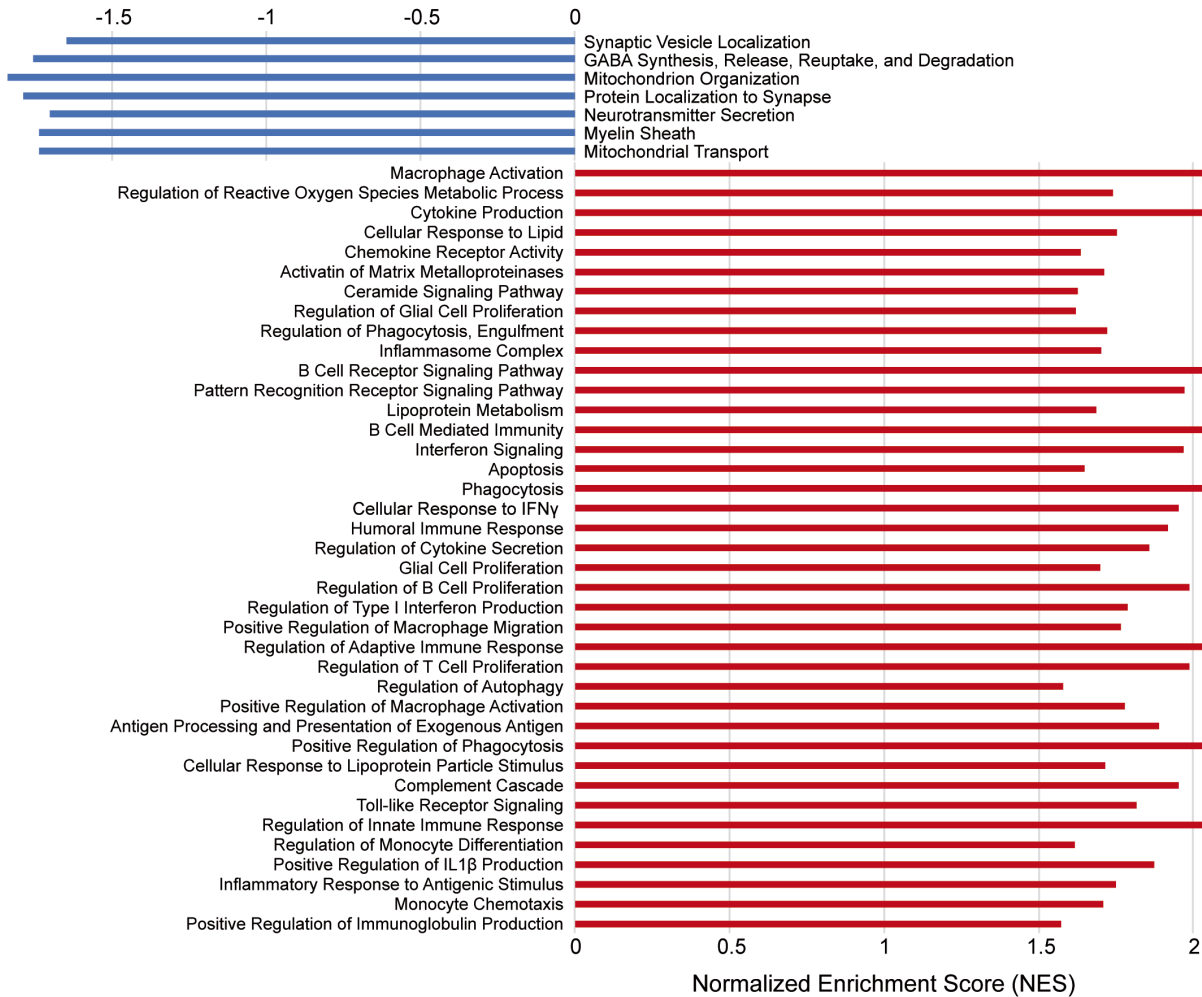

933

934 **Figure 11. Biological processes enriched in peri-infarct regions of aged mice at 7**

935 **weeks after stroke.** Gene set enrichment analysis (GSEA) revealed significant

936 enrichment of multiple biological processes in the peri-infarct regions of aged mice,

937 depicted in red. Conversely, GSEA identified biological processes more significantly

938 enriched in the equivalent region of the contralateral hemisphere, depicted in blue.



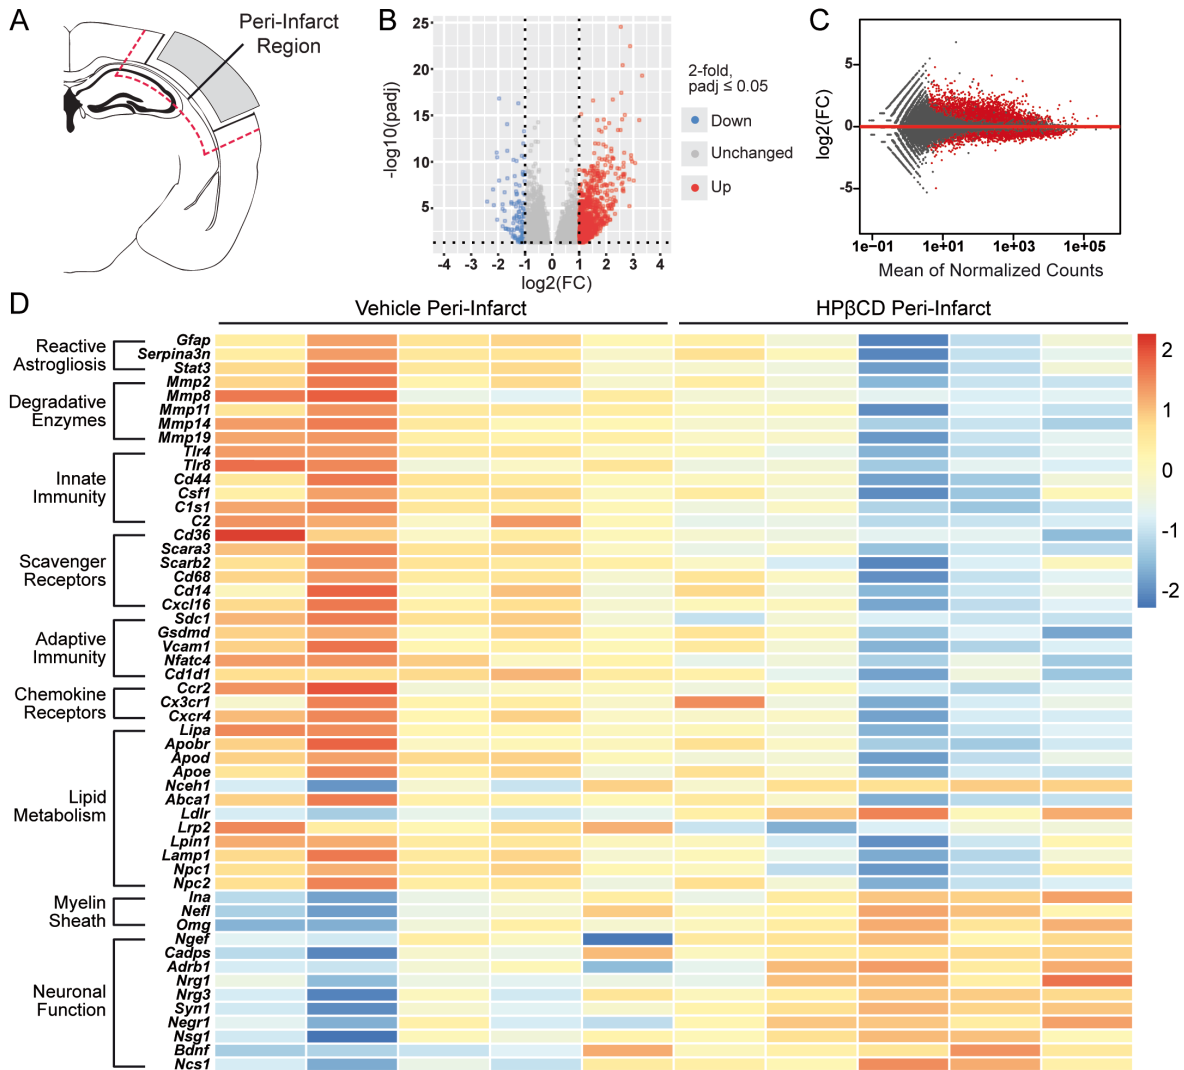

939

940 **Figure 12. HPβCD attenuates inflammation and increases transcripts associated**

941 **with neuronal function in peri-infarct regions of aged mice after stroke. A,**

942 Schematic of a mouse coronal brain section following stroke induced by distal middle

943 cerebral artery occlusion + hypoxia, with the analyzed region indicated. **B, C,** Volcano

944 (**B**) and MA (**C**) plots constructed from count data show differences in gene expression

945 between peri-infarct regions from vehicle- and HPβCD-treated aged mice at 7 weeks

946 after stroke (false discovery rate-adjusted  $p < 0.05$ ;  $\text{FC} > |2|$ ). **D,** Row-scaled heatmap

- 947 displaying differentially expressed genes associated with lipid metabolism,  
948 inflammation, and neuronal function (false discovery rate-adjusted  $p < 0.05$ ;  $FC > |2|$ ).  
949 FC, fold change.

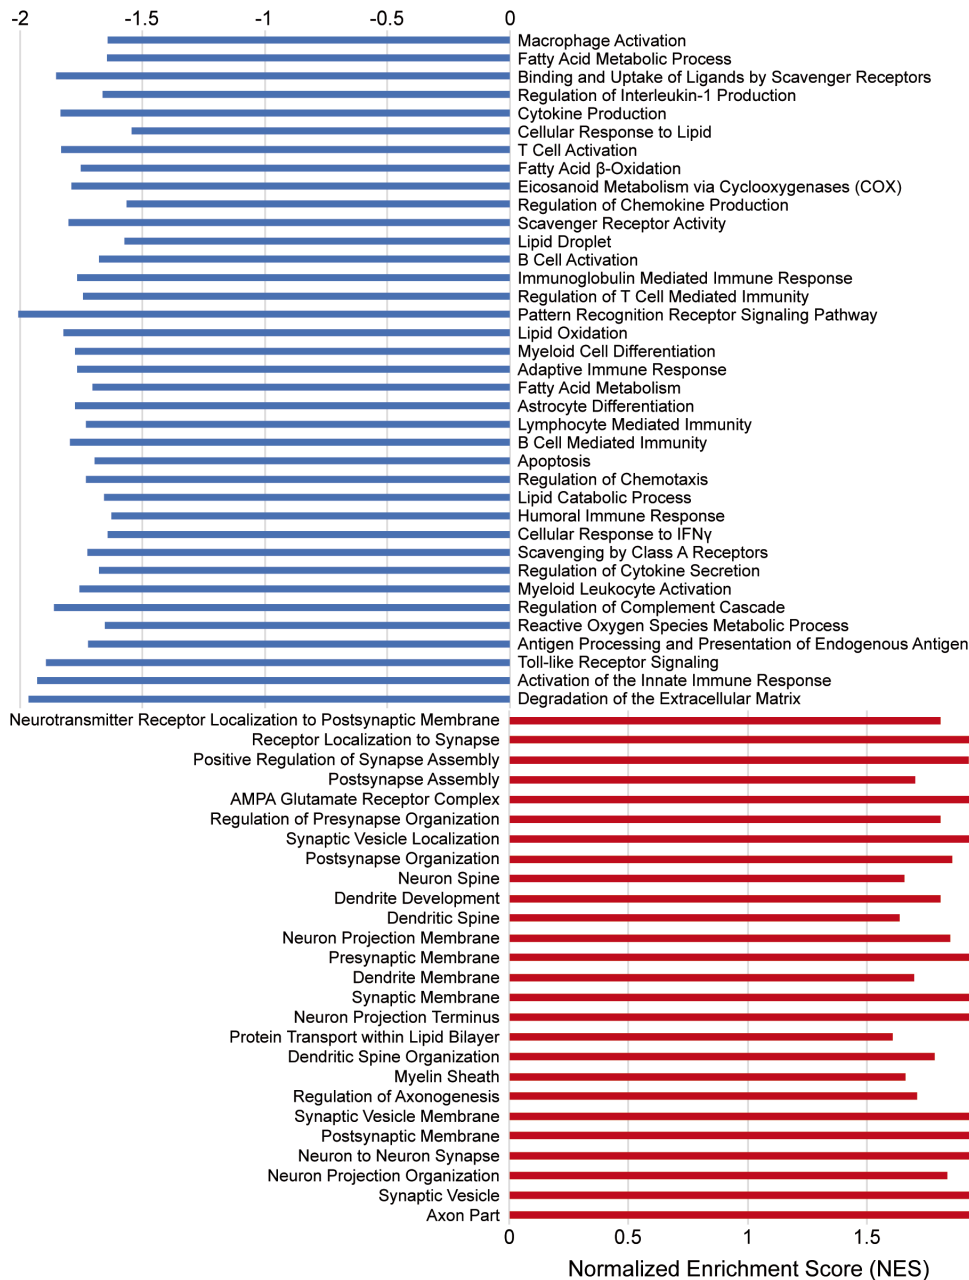

950

951 **Figure 13. Biological processes enriched in peri-infarct regions of HPβCD-treated**

952 **aged mice at 7 weeks after stroke.** Gene set enrichment analysis (GSEA) revealed

953 significant enrichment of multiple biological processes in peri-infarct regions of HPβCD-

954 treated aged mice, depicted in red. Conversely, GSEA identified biological processes

955 more significantly enriched in peri-infarct regions of vehicle-injected aged mice, depicted  
956 in blue.

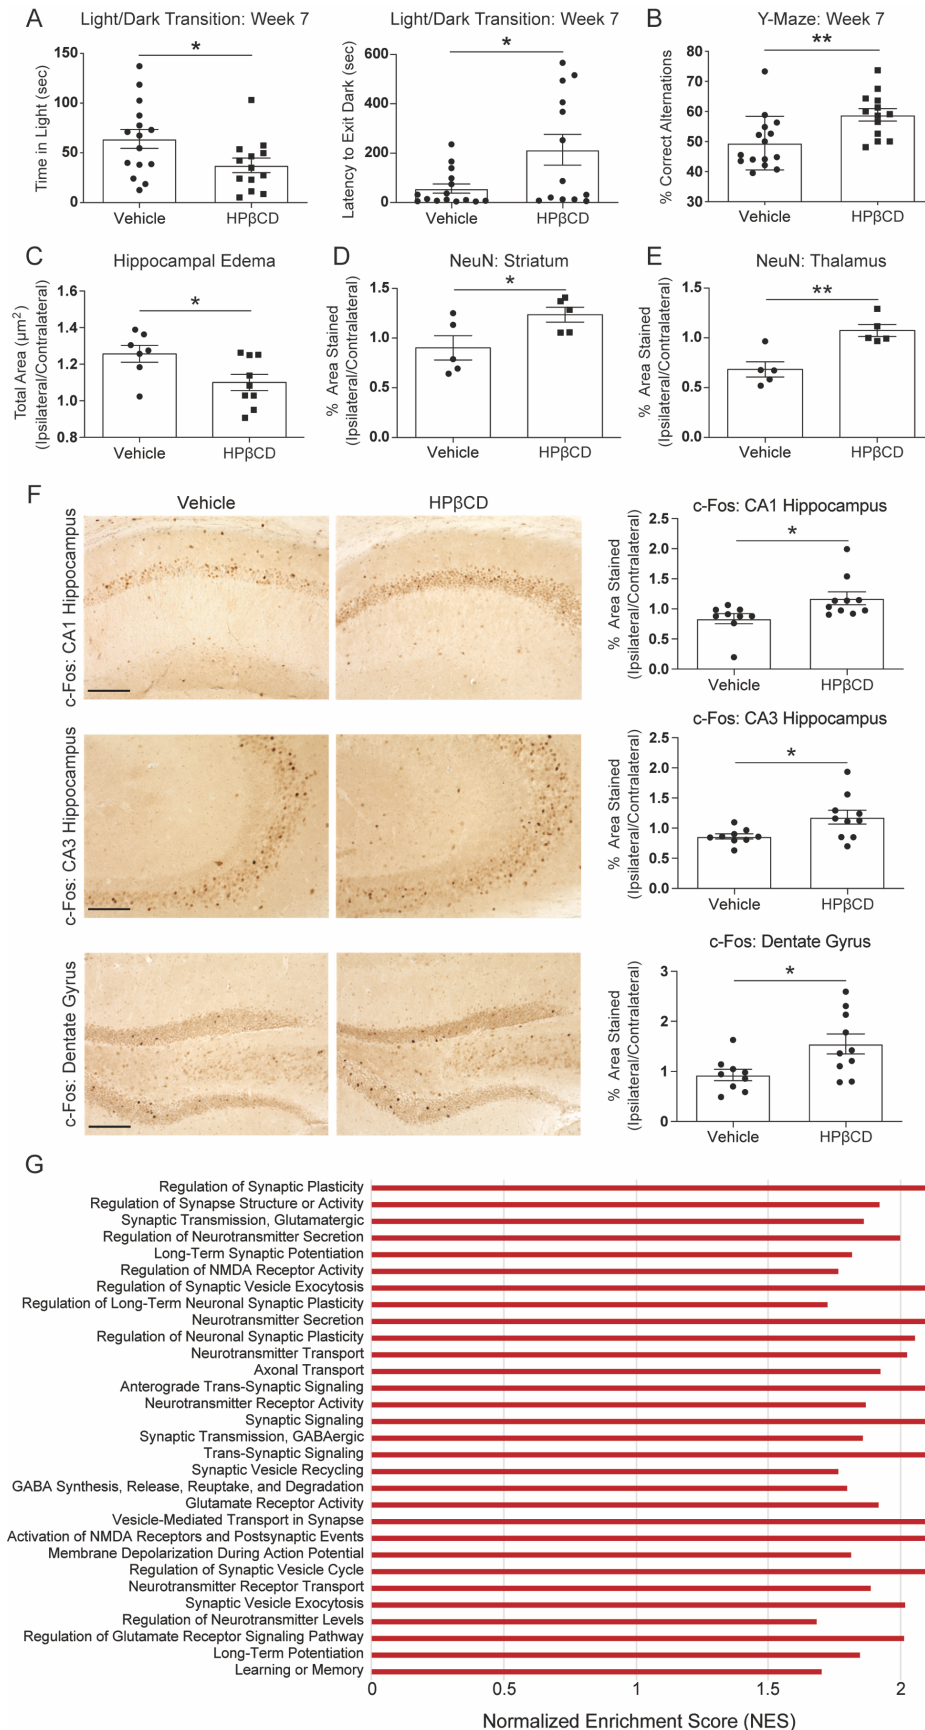

958 **Figure 14. HP $\beta$ CD attenuates neurodegeneration and improves recovery in aged**  
959 **mice after stroke. A,** HP $\beta$ CD-treated aged mice exhibited less impulsive behavior than  
960 vehicle-injected mice in the light/dark transition test at 7 weeks after stroke. ( $n = 13-15$ ;  
961 unpaired  $t$  tests;  $*p < 0.05$ ). **B,** HP $\beta$ CD-treated aged mice exhibited intact spatial  
962 working memory in the Y-maze spontaneous alternation behavior test compared to  
963 vehicle-injected aged mice at 7 weeks after stroke. ( $n = 14-15$ ; unpaired  $t$  test;  $*p <$   
964  $0.05$ ). **C,** Quantification of hippocampal edema at 7 weeks after stroke in vehicle- and  
965 HP $\beta$ CD-treated mice. ( $n = 7-9$ ; unpaired  $t$  test;  $*p < 0.05$ ). **D, E,** Quantification of NeuN  
966 immunoreactivity in the striatum and thalamus from vehicle- or HP $\beta$ CD-treated mice. ( $n$   
967  $= 5$ ; unpaired  $t$  tests;  $*p < 0.05$ ,  $**p < 0.01$ ). **F,** Representative 20 $\times$  images of c-Fos  
968 immunoreactivity in hippocampal regions from vehicle- or HP $\beta$ CD-treated mice.  
969 Quantification of images is shown to the right of each photomicrograph. ( $n = 9-10$ ;  
970 unpaired  $t$  tests;  $*p < 0.05$ ,  $***p < 0.001$ ). Scale bar, 125  $\mu$ m. Data are presented as  
971 mean  $\pm$  SEM. **G,** Gene set enrichment analysis revealed significant enrichment of  
972 biological processes associated with neuronal function and activity in peri-infarct regions  
973 of HP $\beta$ CD-treated aged mice at 7 weeks after stroke.

| Figure | Group Size (n)                   | Statistical Test                                                | Statistical Values                                                | p value  | post hoc Comparisons                                                                                                                                                                                                                                                                                                                                                                                                                                                                                      | p value                                                                                                                                                                                                                                                                                                                                                          |
|--------|----------------------------------|-----------------------------------------------------------------|-------------------------------------------------------------------|----------|-----------------------------------------------------------------------------------------------------------------------------------------------------------------------------------------------------------------------------------------------------------------------------------------------------------------------------------------------------------------------------------------------------------------------------------------------------------------------------------------------------------|------------------------------------------------------------------------------------------------------------------------------------------------------------------------------------------------------------------------------------------------------------------------------------------------------------------------------------------------------------------|
| 1A     | 4                                | Paired <i>t</i> test                                            | <i>M</i> (Contra Cortex - Infarct) = -51.71<br><i>SEM</i> = 1.300 | < 0.0001 | N/A                                                                                                                                                                                                                                                                                                                                                                                                                                                                                                       | N/A                                                                                                                                                                                                                                                                                                                                                              |
| 1B     | Infarct = 7<br>Contra Cortex = 4 | Unpaired <i>t</i> test                                          | <i>M</i> (Contra Cortex - Infarct) = -34.14<br><i>SEM</i> = 1.077 | < 0.0001 | N/A                                                                                                                                                                                                                                                                                                                                                                                                                                                                                                       | N/A                                                                                                                                                                                                                                                                                                                                                              |
| 1C     | 8                                | Multiple <i>t</i> tests; Holm-Sidak's multiple comparisons test | N/A                                                               | N/A      | SM 14:0_16.51<br>SM 15:0_17.67<br>SM 16:0_19.05<br>SM 16:1_16.92<br>SM 16:1_17.23<br>SM 18:0_22.55<br>SM 18:1_19.71<br>SM 18:1_20.12<br>SM 19:0_24.48<br>SM 20:0_26.16<br>SM 20:1_23.41<br>SM 21:0_27.48<br>SM 22:0_28.28<br>SM 22:1_26.30<br>SM 22:1_26.87<br>SM 22:2_23.57<br>SM 23:0_28.82<br>SM 23:1_27.48<br>SM 23:2_25.37<br>SM 24:0_29.21<br>SM 24:1_28.23<br>SM 24:2_26.78<br>SM 24:3_24.26<br>SM 24:3_24.64<br>SM 24:4_22.21<br>SM 25:0_29.62<br>SM 26:0_29.96<br>SM 26:1_29.14<br>SM 26:2_28.42 | 0.000003<br>< 0.000001<br>< 0.000001<br>0.000003<br>0.000004<br>0.00379<br>0.000172<br>0.009913<br>0.002555<br>0.000813<br>0.0018<br>0.006607<br>< 0.000001<br>0.000006<br>0.000056<br>0.000003<br>0.002919<br>< 0.000001<br>0.000017<br>< 0.000001<br>< 0.000001<br>0.000062<br>0.000002<br>0.000004<br>0.000005<br>0.000226<br>0.000076<br>0.000001<br>0.00016 |
| 2A     | 4                                | Paired <i>t</i> test                                            | <i>M</i> (Contra Cortex - Infarct) = -54.83<br><i>SEM</i> = 1.527 | < 0.0001 | N/A                                                                                                                                                                                                                                                                                                                                                                                                                                                                                                       | N/A                                                                                                                                                                                                                                                                                                                                                              |
| 2B     | 9                                | Paired <i>t</i> test                                            | <i>M</i> (Contra Cortex - Infarct) = -27.39                       | < 0.0001 | N/A                                                                                                                                                                                                                                                                                                                                                                                                                                                                                                       | N/A                                                                                                                                                                                                                                                                                                                                                              |

|            |              |                                                                 | SEM = 0.9784                        |          |         |          |
|------------|--------------|-----------------------------------------------------------------|-------------------------------------|----------|---------|----------|
| 2C         | 5            | Multiple <i>t</i> tests; Holm-Sidak's multiple comparisons test | N/A                                 | N/A      | CE 12:0 | 0.007817 |
|            |              |                                                                 |                                     |          | CE 14:0 | 0.000752 |
|            |              |                                                                 |                                     |          | CE 15:0 | 0.003201 |
|            |              |                                                                 |                                     |          | CE 16:0 | 0.000217 |
|            |              |                                                                 |                                     |          | CE 16:1 | 0.000495 |
|            |              |                                                                 |                                     |          | CE 17:0 | 0.001331 |
|            |              |                                                                 |                                     |          | CE 18:0 | 0.000894 |
|            |              |                                                                 |                                     |          | CE 18:1 | 0.001131 |
|            |              |                                                                 |                                     |          | CE 18:2 | 0.001921 |
|            |              |                                                                 |                                     |          | CE 18:3 | 0.001145 |
|            |              |                                                                 |                                     |          | CE 20:0 | 0.005071 |
|            |              |                                                                 |                                     |          | CE 20:3 | 0.001136 |
|            |              |                                                                 |                                     |          | CE 20:4 | 0.000936 |
|            |              |                                                                 |                                     |          | CE 20:5 | 0.000785 |
|            |              |                                                                 |                                     |          | CE 22:0 | 0.00243  |
| CE 22:6    | 0.005786     |                                                                 |                                     |          |         |          |
| CE 24:0    | 0.007793     |                                                                 |                                     |          |         |          |
| CE 24:1    | 0.000802     |                                                                 |                                     |          |         |          |
| 5B (B220)  | Vehicle = 11 | Unpaired <i>t</i> test                                          | <i>M</i> (HPβCD - Vehicle) = -12.22 | < 0.0001 | N/A     | N/A      |
|            | HPβCD = 10   |                                                                 | SEM = 1.819                         |          |         |          |
| 5B (CD3ε)  | Vehicle = 11 | Unpaired <i>t</i> test                                          | <i>M</i> (HPβCD - Vehicle) = -7.695 | < 0.0001 | N/A     | N/A      |
|            | HPβCD = 10   |                                                                 | SEM = 0.9035                        |          |         |          |
| 5B (CD138) | 4            | Unpaired <i>t</i> test                                          | <i>M</i> (HPβCD - Vehicle) = -51.22 | 0.0163   | N/A     | N/A      |
|            |              |                                                                 | SEM = 15.49                         |          |         |          |
| 5B (IgA)   | 8            | Unpaired <i>t</i> test                                          | <i>M</i> (HPβCD - Vehicle) = -34.30 | 0.0026   | N/A     | N/A      |
|            |              |                                                                 | SEM = 9.362                         |          |         |          |
| 5B (ORO)   | 4            | Unpaired <i>t</i> test                                          | <i>M</i> (HPβCD - Vehicle) = -4.999 | 0.0462   | N/A     | N/A      |
|            |              |                                                                 | SEM = 1.995                         |          |         |          |
| 6B (B220)  | Vehicle = 4  | Unpaired <i>t</i> test                                          | <i>M</i> (HPβCD - Vehicle) = -6.580 | 0.0039   | N/A     | N/A      |
|            | HPβCD = 5    |                                                                 | SEM = 0.8794                        |          |         |          |
| 6B (CD3ε)  | Vehicle = 8  | Unpaired <i>t</i> test                                          | <i>M</i> (HPβCD - Vehicle) = -12.75 | 0.0002   | N/A     | N/A      |
|            | HPβCD = 7    |                                                                 | SEM = 2.429                         |          |         |          |
| 6B (IgA)   | Vehicle = 5  | Unpaired <i>t</i> test                                          | <i>M</i> (HPβCD - Vehicle) = -21.55 | 0.0477   | N/A     | N/A      |
|            | HPβCD = 6    |                                                                 | SEM = 8.139                         |          |         |          |
| 6B (ORO)   | 4            | Unpaired <i>t</i> test                                          | <i>M</i> (HPβCD - Vehicle) = -9.330 | 0.0002   | N/A     | N/A      |



|                     |              |                                                                 |                                       |        |             |          |
|---------------------|--------------|-----------------------------------------------------------------|---------------------------------------|--------|-------------|----------|
|                     |              |                                                                 | SEM = 1.124                           |        |             |          |
| 6B (Alcian Blue)    | Vehicle = 9  | Unpaired <i>t</i> test                                          | <i>M</i> (HPβCD - Vehicle) = -1.372   | 0.4921 | N/A         | N/A      |
|                     | HPβCD = 10   |                                                                 | SEM = 1.954                           |        |             |          |
| 7B (CD19+GL 7-)     | Vehicle = 10 | Unpaired <i>t</i> test                                          | <i>M</i> (HPβCD - Vehicle) = 3.258    | 0.2191 | N/A         | N/A      |
|                     | HPβCD = 9    |                                                                 | SEM = 2.553                           |        |             |          |
| 7B (CD19+GL 7+)     | Vehicle = 10 | Unpaired <i>t</i> test                                          | <i>M</i> (HPβCD - Vehicle) = -0.1013  | 0.4796 | N/A         | N/A      |
|                     | HPβCD = 9    |                                                                 | SEM = 0.1402                          |        |             |          |
| 7C (IgG1)           | Vehicle = 10 | Unpaired <i>t</i> test                                          | <i>M</i> (HPβCD - Vehicle) = -2.589   | 0.9292 | N/A         | N/A      |
|                     | HPβCD = 9    |                                                                 | SEM = 28.71                           |        |             |          |
| 7C (IgA)            | Vehicle = 10 | Unpaired <i>t</i> test                                          | <i>M</i> (HPβCD - Vehicle) = 7.567    | 0.647  | N/A         | N/A      |
|                     | HPβCD = 9    |                                                                 | SEM = 16.23                           |        |             |          |
| 7E (CD4+ T cells)   | 9            | Unpaired <i>t</i> test                                          | <i>M</i> (HPβCD - Vehicle) = 0.03444  | 0.9715 | N/A         | N/A      |
|                     |              |                                                                 | SEM = 0.9497                          |        |             |          |
| 7E (CD8+ T cells)   | 9            | Unpaired <i>t</i> test                                          | <i>M</i> (HPβCD - Vehicle) = -0.08889 | 0.9419 | N/A         | N/A      |
|                     |              |                                                                 | SEM = 1.201                           |        |             |          |
| 7E (Tregs)          | 9            | Unpaired <i>t</i> test                                          | <i>M</i> (HPβCD - Vehicle) = -1.844   | 0.422  | N/A         | N/A      |
|                     |              |                                                                 | SEM = 2.238                           |        |             |          |
| 7F                  | 6            | Multiple <i>t</i> tests; Holm-Sidak's multiple comparisons test | N/A                                   | N/A    | WBC         | 0.109564 |
|                     |              |                                                                 |                                       |        | Neutrophils | 0.213092 |
|                     |              |                                                                 |                                       |        | Lymphocytes | 0.0445   |
|                     |              |                                                                 |                                       |        | Monocytes   | 0.027171 |
|                     |              |                                                                 |                                       |        | Eosinophils | 0.662546 |
|                     |              |                                                                 |                                       |        | Basophils   | 0.58393  |
| 8E ( <i>Npc1</i> )  | 4            | Unpaired <i>t</i> test                                          | <i>M</i> (HPβCD - Vehicle) = 0.8853   | 0.0008 | N/A         | N/A      |
|                     |              |                                                                 | SEM = 0.1417                          |        |             |          |
| 8E ( <i>Npc2</i> )  | 4            | Unpaired <i>t</i> test                                          | <i>M</i> (HPβCD - Vehicle) = 0.6104   | 0.0071 | N/A         | N/A      |
|                     |              |                                                                 | SEM = 0.1525                          |        |             |          |
| 8E ( <i>Abca1</i> ) | 4            | Unpaired <i>t</i> test                                          | <i>M</i> (HPβCD - Vehicle) = 0.7311   | 0.0208 | N/A         | N/A      |
|                     |              |                                                                 | SEM = 0.2348                          |        |             |          |
| 8E ( <i>Apoe</i> )  | 4            | Unpaired <i>t</i> test                                          | <i>M</i> (HPβCD - Vehicle) = 0.6647   | 0.0228 | N/A         | N/A      |
|                     |              |                                                                 | SEM = 0.2186                          |        |             |          |
| 8E ( <i>Trem2</i> ) | 4            | Unpaired <i>t</i> test                                          | <i>M</i> (HPβCD - Vehicle) = 0.7428   | 0.0187 | N/A         | N/A      |
|                     |              |                                                                 | SEM = 0.2325                          |        |             |          |
| 14A (Time)          | Vehicle = 15 | Unpaired <i>t</i> test                                          | <i>M</i> (HPβCD - Vehicle) = -26.63   | 0.0393 | N/A         | N/A      |

|                           |              |                        |                                         |        |     |     |
|---------------------------|--------------|------------------------|-----------------------------------------|--------|-----|-----|
|                           | HPβCD = 13   |                        | SEM = 12.27                             |        |     |     |
| 14A<br>(Latency)          | Vehicle = 15 | Unpaired <i>t</i> test | <i>M</i> (HPβCD - Vehicle)<br>= 157.5   | 0.0165 | N/A | N/A |
|                           | HPβCD = 13   |                        | SEM = 61.44                             |        |     |     |
| 14B                       | Vehicle = 15 | Unpaired <i>t</i> test | <i>M</i> (HPβCD - Vehicle)<br>= 8.520   | 0.0113 | N/A | N/A |
|                           | HPβCD = 14   |                        | SEM = 3.133                             |        |     |     |
| 14C                       | Vehicle = 7  | Unpaired <i>t</i> test | <i>M</i> (HPβCD - Vehicle)<br>= -0.1564 | 0.0311 | N/A | N/A |
|                           | HPβCD = 9    |                        | SEM = 0.06527                           |        |     |     |
| 14D                       | 5            | Unpaired <i>t</i> test | <i>M</i> (HPβCD - Vehicle)<br>= 0.3339  | 0.0487 | N/A | N/A |
|                           |              |                        | SEM = 0.1438                            |        |     |     |
| 14E                       | 5            | Unpaired <i>t</i> test | <i>M</i> (HPβCD - Vehicle)<br>= 0.3901  | 0.0039 | N/A | N/A |
|                           |              |                        | SEM = 0.09717                           |        |     |     |
| 14F (CA1<br>Hippocampus)  | Vehicle = 9  | Unpaired <i>t</i> test | <i>M</i> (HPβCD - Vehicle)<br>= 0.3379  | 0.0268 | N/A | N/A |
|                           | HPβCD = 10   |                        | SEM = 0.1394                            |        |     |     |
| 14F (CA3<br>Hippocampus)  | Vehicle = 9  | Unpaired <i>t</i> test | <i>M</i> (HPβCD - Vehicle)<br>= 0.3196  | 0.0229 | N/A | N/A |
|                           | HPβCD = 10   |                        | SEM = 0.1278                            |        |     |     |
| 14F<br>(Dentate<br>Gyrus) | Vehicle = 9  | Unpaired <i>t</i> test | <i>M</i> (HPβCD - Vehicle)<br>= 0.6193  | 0.0178 | N/A | N/A |
|                           | HPβCD = 10   |                        | SEM = 0.2362                            |        |     |     |

974 **Table 1. Statistical table.**

975 **References**

- 976 Albertini, G., Walrave, L., Demuyser, T., Massie, A., De Bundel, D., & Smolders, I.  
977 (2018). 6 Hz corneal kindling in mice triggers neurobehavioral comorbidities  
978 accompanied by relevant changes in c-Fos immunoreactivity throughout the brain.  
979 *Epilepsia*, 59(1), 67–78. <https://doi.org/10.1111/epi.13943>
- 980 Anders, S., Pyl, P. T., & Huber, W. (2015). HTSeq-A Python framework to work with  
981 high-throughput sequencing data. *Bioinformatics*.  
982 <https://doi.org/10.1093/bioinformatics/btu638>
- 983 Ankeny, D. P., Lucin, K. M., Sanders, V. M., McGaughy, V. M., & Popovich, P. G.  
984 (2006). Spinal cord injury triggers systemic autoimmunity: evidence for chronic B  
985 lymphocyte activation and lupus-like autoantibody synthesis. *Journal of*  
986 *Neurochemistry*, 99(4), 1073–1087. [https://doi.org/10.1111/j.1471-](https://doi.org/10.1111/j.1471-4159.2006.04147.x)  
987 [4159.2006.04147.x](https://doi.org/10.1111/j.1471-4159.2006.04147.x)
- 988 Aslanian, A. M., & Charo, I. F. (2006). Targeted disruption of the scavenger receptor  
989 and chemokine CXCL16 accelerates atherosclerosis. *Circulation*.  
990 <https://doi.org/10.1161/CIRCULATIONAHA.105.540583>
- 991 Black, S. E. (2011). Vascular cognitive impairment: Epidemiology, subtypes, diagnosis  
992 and management. *Journal of the Royal College of Physicians of Edinburgh*, 41(1),  
993 49–56. <https://doi.org/10.4997/JRCPE.2011.121>
- 994 Bolger, A. M., Lohse, M., & Usadel, B. (2014). Trimmomatic: A flexible trimmer for  
995 Illumina sequence data. *Bioinformatics*.  
996 <https://doi.org/10.1093/bioinformatics/btu170>
- 997 Bourin, M., & Hascoët, M. (2003, February 28). The mouse light/dark box test.

- 998 *European Journal of Pharmacology*. Elsevier. <https://doi.org/10.1016/S0014->  
999 2999(03)01274-3
- 1000 Cantuti-Castelvetri, L., Fitzner, D., Bosch-Queralt, M., Weil, M. T., Su, M., Sen, P., ...  
1001 Simons, M. (2018). Defective cholesterol clearance limits remyelination in the aged  
1002 central nervous system. *Science*. <https://doi.org/10.1126/science.aan4183>
- 1003 Chung, A. G., Frye, J. B., Zbesko, J. C., Constantopoulos, E., Hayes, M., Figueroa, A.  
1004 G., ... Doyle, K. P. (2018). Liquefaction of the brain following stroke shares a  
1005 similar molecular and morphological profile with atherosclerosis and mediates  
1006 secondary neurodegeneration in an osteopontin-dependent mechanism. *ENeuro*,  
1007 5(5). <https://doi.org/10.1523/ENEURO.0076-18.2018>
- 1008 Dietschy, J. M., & Turley, S. D. (2001). Cholesterol metabolism in the brain. *Current*  
1009 *Opinion in Lipidology*. <https://doi.org/10.1097/00041433-200104000-00003>
- 1010 Dobin, A., Davis, C. A., Schlesinger, F., Drenkow, J., Zaleski, C., Jha, S., ... Gingeras,  
1011 T. R. (2013). STAR: Ultrafast universal RNA-seq aligner. *Bioinformatics*.  
1012 <https://doi.org/10.1093/bioinformatics/bts635>
- 1013 Doyle, K. P., Quach, L. N., Sole, M., Axtell, R. C., Nguyen, T.-V. V., Soler-Llavina, G. J.,  
1014 ... Buckwalter, M. S. (2015). B-Lymphocyte-Mediated Delayed Cognitive  
1015 Impairment following Stroke. *Journal of Neuroscience*, 35(5), 2133–2145.  
1016 <https://doi.org/10.1523/JNEUROSCI.4098-14.2015>
- 1017 Doyle, Kristian P., Fathali, N., Siddiqui, M. R., & Buckwalter, M. S. (2012). Distal  
1018 hypoxic stroke: A new mouse model of stroke with high throughput, low variability  
1019 and a quantifiable functional deficit. *Journal of Neuroscience Methods*.  
1020 <https://doi.org/10.1016/j.jneumeth.2012.03.003>

- 1021 Febbraio, M., Hajjar, D. P., & Silverstein, R. L. (2001). CD36: A class B scavenger  
1022 receptor involved in angiogenesis, atherosclerosis, inflammation, and lipid  
1023 metabolism. *Journal of Clinical Investigation*. <https://doi.org/10.1172/JCI14006>
- 1024 Fitzner, D., Bader, J. M., Penkert, H., Bergner, C. G., Su, M., Weil, M. T., ... Simons, M.  
1025 (2020). Cell-Type- and Brain-Region-Resolved Mouse Brain Lipidome. *Cell*  
1026 *Reports*. <https://doi.org/10.1016/j.celrep.2020.108132>
- 1027 Fleischmann, A., Hvalby, O., Jensen, V., Strekalova, T., Zacher, C., Layer, L. E., ...  
1028 Gass, P. (2003). Impaired long-term memory and NR2A-type NMDA receptor-  
1029 dependent synaptic plasticity in mice lacking c-fos in the CNS. *Journal of*  
1030 *Neuroscience*, 23(27), 9116–9122. [https://doi.org/10.1523/jneurosci.23-27-](https://doi.org/10.1523/jneurosci.23-27-09116.2003)  
1031 [09116.2003](https://doi.org/10.1523/jneurosci.23-27-09116.2003)
- 1032 Gaspar, J., Mathieu, J., & Alvarez, P. (2017). 2-Hydroxypropyl-beta-cyclodextrin  
1033 (HP $\beta$ CD) reduces age-related lipofuscin accumulation through a cholesterol-  
1034 associated pathway. *Scientific Reports*. [https://doi.org/10.1038/s41598-017-02387-](https://doi.org/10.1038/s41598-017-02387-8)  
1035 [8](https://doi.org/10.1038/s41598-017-02387-8)
- 1036 Ghosh, S., Zhao, B., Bie, J., & Song, J. (2010). Macrophage cholesteryl ester  
1037 mobilization and atherosclerosis. *Vascular Pharmacology*.  
1038 <https://doi.org/10.1016/j.vph.2009.10.002>
- 1039 Gidwani, B., & Vyas, A. (2015). A Comprehensive Review on Cyclodextrin-Based  
1040 Carriers for Delivery of Chemotherapeutic Cytotoxic Anticancer Drugs. *BioMed*  
1041 *Research International*. <https://doi.org/10.1155/2015/198268>
- 1042 Go, G. W., & Mani, A. (2012). Low-density lipoprotein receptor (LDLR) family  
1043 orchestrates cholesterol homeostasis. *Yale Journal of Biology and Medicine*.

- 1044 Goldberg, I. J., Reue, K., Abumrad, N. A., Bickel, P. E., Cohen, S., Fisher, E. A., ...  
1045 Chen, J. (2018). Deciphering the role of lipid droplets in cardiovascular disease.  
1046 *Circulation*. <https://doi.org/10.1161/CIRCULATIONAHA.118.033704>
- 1047 Liscic, R. M., Storandt, M., Cairns, N. J., & Morris, J. C. (2007). Clinical and  
1048 psychometric distinction of frontotemporal and Alzheimer dementias. *Archives of*  
1049 *Neurology*, 64(4), 535–540. <https://doi.org/10.1001/archneur.64.4.535>
- 1050 Love, M. I., Huber, W., & Anders, S. (2014). Moderated estimation of fold change and  
1051 dispersion for RNA-seq data with DESeq2. *Genome Biology*.  
1052 <https://doi.org/10.1186/s13059-014-0550-8>
- 1053 Luchtman, D. W., & Song, C. (2013). Cognitive enhancement by omega-3 fatty acids  
1054 from child-hood to old age: Findings from animal and clinical studies.  
1055 *Neuropharmacology*. <https://doi.org/10.1016/j.neuropharm.2012.07.019>
- 1056 Mar, F. M., da Silva, T. F., Morgado, M. M., Rodrigues, L. G., Rodrigues, D., Pereira, M.  
1057 I. L., ... Brites, P. (2016). Myelin Lipids Inhibit Axon Regeneration Following Spinal  
1058 Cord Injury: a Novel Perspective for Therapy. *Molecular Neurobiology*.  
1059 <https://doi.org/10.1007/s12035-014-9072-3>
- 1060 Matsuo, M., Togawa, M., Hirabaru, K., Mochinaga, S., Narita, A., Adachi, M., ... Ohno,  
1061 K. (2013). Effects of cyclodextrin in two patients with Niemann-Pick Type C  
1062 disease. *Molecular Genetics and Metabolism*.  
1063 <https://doi.org/10.1016/j.ymgme.2012.11.005>
- 1064 Merico, D., Isserlin, R., Stueker, O., Emili, A., & Bader, G. D. (2010). Enrichment map: A  
1065 network-based method for gene-set enrichment visualization and interpretation.  
1066 *PLoS ONE*. <https://doi.org/10.1371/journal.pone.0013984>

- 1067 Nguyen, T. V. V., Frye, J. B., Zbesko, J. C., Stepanovic, K., Hayes, M., Urzua, A., ...  
1068 Doyle, K. P. (2016). Multiplex immunoassay characterization and species  
1069 comparison of inflammation in acute and non-acute ischemic infarcts in human and  
1070 mouse brain tissue. *Acta Neuropathologica Communications*, 4(1), 100.  
1071 <https://doi.org/10.1186/s40478-016-0371-y>
- 1072 Nguyen, T. V. V., Hayes, M., Zbesko, J. C., Frye, J. B., Congrove, N. R., Belichenko, N.  
1073 P., ... Doyle, K. P. (2018). Alzheimer's associated amyloid and tau deposition co-  
1074 localizes with a homeostatic myelin repair pathway in two mouse models of post-  
1075 stroke mixed dementia. *Acta Neuropathologica Communications*, 6(1), 100.  
1076 <https://doi.org/10.1186/s40478-018-0603-4>
- 1077 Ortega, S. B., Noorbhai, I., Poinsette, K., Kong, X., Anderson, A., Monson, N. L., &  
1078 Stowe, A. M. (2015). Stroke induces a rapid adaptive autoimmune response to  
1079 novel neuronal antigens. *Discov Med*, 19(106), 381–392.
- 1080 Park, Y. M. (2014). CD36, a scavenger receptor implicated in atherosclerosis.  
1081 *Experimental and Molecular Medicine*. <https://doi.org/10.1038/emm.2014.38>
- 1082 Poitelon, Y., Kopec, A. M., & Belin, S. (2020). Myelin Fat Facts: An Overview of Lipids  
1083 and Fatty Acid Metabolism. *Cells*. <https://doi.org/10.3390/cells9040812>
- 1084 Quehenberger, O., Armando, A. M., Brown, A. H., Milne, S. B., Myers, D. S., Merrill, A.  
1085 H., ... Dennis, E. A. (2010). Lipidomics reveals a remarkable diversity of lipids in  
1086 human plasma. *Journal of Lipid Research*. <https://doi.org/10.1194/jlr.M009449>
- 1087 Rahaman, S. O., Lennon, D. J., Febbraio, M., Podrez, E. A., Hazen, S. L., & Silverstein,  
1088 R. L. L. (2006). A CD36-dependent signaling cascade is necessary for macrophage  
1089 foam cell formation. *Cell Metabolism*. <https://doi.org/10.1016/j.cmet.2006.06.007>

- 1090 Raine, C. S., Cannella, B., Hauser, S. L., & Genain, C. P. (1999). Demyelination in  
1091 primate autoimmune encephalomyelitis and acute multiple sclerosis lesions: A case  
1092 for antigen-specific antibody mediation. *Annals of Neurology*, 46(2), 144–160.  
1093 [https://doi.org/10.1002/1531-8249\(199908\)46:2<144::AID-ANA3>3.0.CO;2-K](https://doi.org/10.1002/1531-8249(199908)46:2<144::AID-ANA3>3.0.CO;2-K)
- 1094 Rasheed, A., Kumar C.K., A., & Sravanthi, V. V. N. S. S. (2008). Cyclodextrins as drug  
1095 carrier molecule: A review. *Scientia Pharmaceutica*.  
1096 <https://doi.org/10.3797/scipharm.0808-05>
- 1097 Schindelin, J., Arganda-Carreras, I., Frise, E., Kaynig, V., Longair, M., Pietzsch, T., ...  
1098 Cardona, A. (2012, July). Fiji: An open-source platform for biological-image  
1099 analysis. *Nature Methods*. NIH Public Access. <https://doi.org/10.1038/nmeth.2019>
- 1100 Seifert, H. A., Hall, A. A., Chapman, C. B., Collier, L. A., Willing, A. E., & Pennypacker,  
1101 K. R. (2012). A Transient Decrease in Spleen Size Following Stroke Corresponds  
1102 to Splenocyte Release into Systemic Circulation. *Journal of Neuroimmune*  
1103 *Pharmacology* 2012 7:4, 7(4), 1017–1024. [https://doi.org/10.1007/S11481-012-](https://doi.org/10.1007/S11481-012-9406-8)  
1104 [9406-8](https://doi.org/10.1007/S11481-012-9406-8)
- 1105 Takao, K., & Miyakawa, T. (2006). Light/dark transition test for mice. *Journal of*  
1106 *Visualized Experiments*, (1), 104. <https://doi.org/10.3791/104>
- 1107 Taylor, A. M., Liu, B., Mari, Y., Liu, B., & Repa, J. J. (2012). Cyclodextrin mediates rapid  
1108 changes in lipid balance in Npc1<sup>-/-</sup> mice without carrying cholesterol through the  
1109 bloodstream. *Journal of Lipid Research*. <https://doi.org/10.1194/jlr.M028241>
- 1110 Vance, J. E. (2012). Dysregulation of cholesterol balance in the brain: Contribution to  
1111 neurodegenerative diseases. *DMM Disease Models and Mechanisms*.  
1112 <https://doi.org/10.1242/dmm.010124>



- 1113 Virani, S. S., Alonso, A., Benjamin, E. J., Bittencourt, M. S., Callaway, C. W., Carson, A.  
1114 P., ... Heard, D. G. (2020). Heart disease and stroke statistics—2020 update: A  
1115 report from the American Heart Association. *Circulation*.  
1116 <https://doi.org/10.1161/CIR.0000000000000757>
- 1117 Winzeler, A. M., Mandemakers, W. J., Sun, M. Z., Stafford, M., Phillips, C. T., & Barres,  
1118 B. A. (2011). The lipid sulfatide is a novel myelin-associated inhibitor of CNS axon  
1119 outgrowth. *Journal of Neuroscience*. [https://doi.org/10.1523/JNEUROSCI.3004-](https://doi.org/10.1523/JNEUROSCI.3004-10.2011)  
1120 [10.2011](https://doi.org/10.1523/JNEUROSCI.3004-10.2011)
- 1121 Yamada, K., Noda, Y., Hasegawa, T., Komori, Y., Nikai, T., Sugihara, H., & Nabeshima,  
1122 T. (1996). The role of nitric oxide in dizocilpine-induced impairment of spontaneous  
1123 alternation behavior in mice. *Journal of Pharmacology and Experimental*  
1124 *Therapeutics*.
- 1125 Yang, Y., Hu, F., Yang, G., & Meng, Q. (2020). Lack of sphingomyelin synthase 2  
1126 reduces cerebral ischemia/reperfusion injury by inhibiting microglial inflammation in  
1127 mice. *Experimental and Therapeutic Medicine*, 20(6).  
1128 <https://doi.org/10.3892/etm.2020.9371>
- 1129 Yu, X. H., Fu, Y. C., Zhang, D. W., Yin, K., & Tang, C. K. (2013). Foam cells in  
1130 atherosclerosis. *Clinica Chimica Acta; International Journal of Clinical Chemistry*.  
1131 <https://doi.org/10.1016/j.cca.2013.06.006> [doi]
- 1132 Zamanian, J. L., Xu, L., Foo, L. C., Nouri, N., Zhou, L., Giffard, R. G., & Barres, B. A.  
1133 (2012). Genomic analysis of reactive astrogliosis. *Journal of Neuroscience*.  
1134 <https://doi.org/10.1523/JNEUROSCI.6221-11.2012>
- 1135 Zbesko, J.C., Frye, J. B., Bechtel, D. A., Gerardo, D. K., Stokes, J., Calderon, K., ...

- 1136 Doyle, K. P. (2020). IgA natural antibodies are produced following T-cell  
1137 independent B-cell activation following stroke. *Brain, Behavior, and Immunity*.  
1138 <https://doi.org/10.1016/j.bbi.2020.09.014>
- 1139 Zbesko, Jacob C., Nguyen, T. V. V., Yang, T., Frye, J. B., Hussain, O., Hayes, M., ...  
1140 Doyle, K. P. (2018). Glial scars are permeable to the neurotoxic environment of  
1141 chronic stroke infarcts. *Neurobiology of Disease*.  
1142 <https://doi.org/10.1016/j.nbd.2018.01.007>
- 1143 Zeibig, S., Büttcher, M., Goebel, S., Pauli, J., Hunger, A., Ungerer, M., ... Münch, G.  
1144 (2019). The scavenger receptor CD68 regulates platelet mediated oxidized low-  
1145 density lipoprotein (oxLDL) deposition in atherosclerotic vessels at an early stage of  
1146 atherosclerosis in LDLr<sup>-/-</sup>/ApoBec<sup>-/-</sup> mice. *Cellular Physiology and Biochemistry*.  
1147 <https://doi.org/10.33594/000000048>
- 1148 Zhu, Y., Lyapichev, K., Lee, D. H., Motti, D., Ferraro, N. M., Zhang, Y., ... Lee, J. K.  
1149 (2017). Macrophage Transcriptional Profile Identifies Lipid Catabolic Pathways That  
1150 Can Be Therapeutically Targeted after Spinal Cord Injury. *The Journal of*  
1151 *Neuroscience*. <https://doi.org/10.1523/JNEUROSCI.2751-16.2017>
- 1152 Zimmer, S., Grebe, A., Bakke, S. S., Bode, N., Halvorsen, B., Ulas, T., ... Latz, E.  
1153 (2016). Cyclodextrin promotes atherosclerosis regression via macrophage  
1154 reprogramming. *Science Translational Medicine*, 8(333).  
1155 <https://doi.org/10.1126/scitranslmed.aad6100>
- 1156
